# Supplementary material for: Establishment and validation of individualized clinical prognostic markers for LUAD patients based on autophagy-related genes
Source: Aging (Albany NY). 2022 Sep 29;14(18):7328–47. doi: 10.18632/aging.204097 (PMC9550247; doi:10.18632/aging.204097)
Supplement: Supplementary Material 1 [file aging-14-204097-s001.xls]

## Sheet: Sheet1
Supplementary Material 1. Autophagy genes from the HADb database.
Name	Symbol
autophagy/beclin-1 regulator 1	AMBRA1
apolipoprotein L, 1	APOL1
aryl hydrocarbon receptor nuclear translocator	ARNT
arylsulfatase A	ARSA
arylsulfatase B	ARSB
activating transcription factor 4 (tax-responsive enhancer element B67)	ATF4
activating transcription factor 6	ATF6
ATG10 autophagy related 10 homolog (S. cerevisiae)	ATG10
ATG12 autophagy related 12 homolog (S. cerevisiae)	ATG12
ATG16 autophagy related 16-like 1 (S. cerevisiae)	ATG16L1
ATG16 autophagy related 16-like 2 (S. cerevisiae)	ATG16L2
ATG2 autophagy related 2 homolog A (S. cerevisiae)	ATG2A
ATG2 autophagy related 2 homolog B (S. cerevisiae)	ATG2B
ATG3 autophagy related 3 homolog (S. cerevisiae)	ATG3
ATG4 autophagy related 4 homolog A (S. cerevisiae)	ATG4A
ATG4 autophagy related 4 homolog B (S. cerevisiae)	ATG4B
ATG4 autophagy related 4 homolog C (S. cerevisiae)	ATG4C
ATG4 autophagy related 4 homolog D (S. cerevisiae)	ATG4D
ATG5 autophagy related 5 homolog (S. cerevisiae)	ATG5
ATG7 autophagy related 7 homolog (S. cerevisiae)	ATG7
ATG9 autophagy related 9 homolog A (S. cerevisiae)	ATG9A
ATG9 autophagy related 9 homolog B (S. cerevisiae)	ATG9B
5-aminoimidazole-4-carboxamide ribonucleotide formyltransferase/IMP cyclohydrolase	ATIC
BCL2-associated athanogene	BAG1
BCL2-associated athanogene 3	BAG3
BCL2-antagonist/killer 1	BAK1
BCL2-associated X protein	BAX
B-cell CLL/lymphoma 2	BCL2
BCL2-like 1	BCL2L1
beclin 1, autophagy related	BECN1
BH3 interacting domain death agonist	BID
baculoviral IAP repeat-containing 5	BIRC5
baculoviral IAP repeat-containing 6	BIRC6
BCL2/adenovirus E1B 19kDa interacting protein 1	BNIP1
BCL2/adenovirus E1B 19kDa interacting protein 3	BNIP3
BCL2/adenovirus E1B 19kDa interacting protein 3-like	BNIP3L
chromosome 12 open reading frame 44	C12orf44
chromosome 17 open reading frame 88	C17orf88
calcium binding and coiled-coil domain 2	CALCOCO2
calcium/calmodulin-dependent protein kinase kinase 2, beta	CAMKK2
calnexin	CANX
calpain 1, (mu/I) large subunit	CAPN1
calpain 10	CAPN10
calpain 2, (m/II) large subunit	CAPN2
calpain, small subunit 1	CAPNS1
caspase 1, apoptosis-related cysteine peptidase (interleukin 1, beta, convertase)	CASP1
caspase 3, apoptosis-related cysteine peptidase	CASP3
caspase 4, apoptosis-related cysteine peptidase	CASP4
caspase 8, apoptosis-related cysteine peptidase	CASP8
chemokine (C-C motif) ligand 2	CCL2
chemokine (C-C motif) receptor 2	CCR2
CD46 molecule, complement regulatory protein	CD46
cyclin-dependent kinase inhibitor 1A (p21, Cip1)	CDKN1A
cyclin-dependent kinase inhibitor 1B (p27, Kip1)	CDKN1B
cyclin-dependent kinase inhibitor 2A (melanoma, p16, inhibits CDK4)	CDKN2A
CASP8 and FADD-like apoptosis regulator	CFLAR
chromatin modifying protein 2B	CHMP2B
chromatin modifying protein 4B	CHMP4B
ceroid-lipofuscinosis, neuronal 3	CLN3
cathepsin B	CTSB
cathepsin D	CTSD
cathepsin L1	CTSL1
chemokine (C-X3-C motif) ligand 1	CX3CL1
chemokine (C-X-C motif) receptor 4	CXCR4
death-associated protein kinase 1	DAPK1
death-associated protein kinase 2	DAPK2
DNA-damage-inducible transcript 3	DDIT3
DIRAS family, GTP-binding RAS-like 3	DIRAS3
deleted in liver cancer 1	DLC1
DnaJ (Hsp40) homolog, subfamily B, member 1	DNAJB1
DnaJ (Hsp40) homolog, subfamily B, member 9	DNAJB9
DNA-damage regulated autophagy modulator 1	DRAM1
ER degradation enhancer, mannosidase alpha-like 1	EDEM1
eukaryotic translation elongation factor 2	EEF2
eukaryotic elongation factor-2 kinase	EEF2K
epidermal growth factor receptor (erythroblastic leukemia viral (v-erb-b) oncogene homolog, avian)	EGFR
eukaryotic translation initiation factor 2-alpha kinase 2	EIF2AK2
eukaryotic translation initiation factor 2-alpha kinase 3	EIF2AK3
eukaryotic translation initiation factor 2, subunit 1 alpha, 35kDa	EIF2S1
eukaryotic translation initiation factor 4E binding protein 1	EIF4EBP1
eukaryotic translation initiation factor 4 gamma, 1	EIF4G1
v-erb-b2 erythroblastic leukemia viral oncogene homolog 2, neuro/glioblastoma derived oncogene homolog (avian)	ERBB2
endoplasmic reticulum to nucleus signaling 1	ERN1
ERO1-like (S. cerevisiae)	ERO1L
Fas (TNFRSF6)-associated via death domain	FADD
family with sequence similarity 48, member A	FAM48A
Fas (TNF receptor superfamily, member 6)	FAS
FK506 binding protein 1A, 12kDa	FKBP1A
FK506 binding protein 1B, 12.6 kDa	FKBP1B
FBJ murine osteosarcoma viral oncogene homolog	FOS
forkhead box O1	FOXO1
forkhead box O3	FOXO3
glucosidase, alpha; acid	GAA
glucosidase, alpha; acid	GAA
GABA(A) receptor-associated protein	GABARAP
GABA(A) receptor-associated protein	GABARAP
GABA(A) receptor-associated protein like 1	GABARAPL1
GABA(A) receptor-associated protein like 1	GABARAPL1
GABA(A) receptor-associated protein-like 2	GABARAPL2
GABA(A) receptor-associated protein-like 2	GABARAPL2
glyceraldehyde-3-phosphate dehydrogenase	GAPDH
glyceraldehyde-3-phosphate dehydrogenase	GAPDH
guanine nucleotide binding protein (G protein), alpha inhibiting activity polypeptide 3	GNAI3
guanine nucleotide binding protein (G protein), alpha inhibiting activity polypeptide 3	GNAI3
guanine nucleotide binding protein (G protein), beta polypeptide 2-like 1	GNB2L1
guanine nucleotide binding protein (G protein), beta polypeptide 2-like 1	GNB2L1
golgi-associated PDZ and coiled-coil motif containing	GOPC
golgi-associated PDZ and coiled-coil motif containing	GOPC
glutamate receptor, ionotropic, delta 1	GRID1
glutamate receptor, ionotropic, delta 1	GRID1
glutamate receptor, ionotropic, delta 2	GRID2
glutamate receptor, ionotropic, delta 2	GRID2
histone deacetylase 1	HDAC1
histone deacetylase 6	HDAC6
hepatocyte growth factor-regulated tyrosine kinase substrate	HGS
hypoxia inducible factor 1, alpha subunit (basic helix-loop-helix transcription factor)	HIF1A
heat shock protein 90kDa alpha (cytosolic), class B member 1	HSP90AB1
heat shock 70kDa protein 5 (glucose-regulated protein, 78kDa)	HSPA5
heat shock 70kDa protein 8	HSPA8
heat shock 22kDa protein 8	HSPB8
interferon, gamma	IFNG
inhibitor of kappa light polypeptide gene enhancer in B-cells, kinase beta	IKBKB
inhibitor of kappa light polypeptide gene enhancer in B-cells, kinase epsilon	IKBKE
interleukin 24	IL24
immunity-related GTPase family, M	IRGM
integrin, alpha 3 (antigen CD49C, alpha 3 subunit of VLA-3 receptor)	ITGA3
integrin, alpha 6	ITGA6
integrin, beta 1 (fibronectin receptor, beta polypeptide, antigen CD29 includes MDF2, MSK12)	ITGB1
integrin, beta 4	ITGB4
inositol 1,4,5-triphosphate receptor, type 1	ITPR1
KIAA0226	KIAA0226
KIAA0652	KIAA0652
KIAA0831	KIAA0831
kinesin family member 5B	KIF5B
kelch-like 24 (Drosophila)	KLHL24
lysosomal-associated membrane protein 1	LAMP1
lysosomal-associated membrane protein 2	LAMP2
microtubule-associated protein 1 light chain 3 alpha	MAP1LC3A
microtubule-associated protein 1 light chain 3 beta	MAP1LC3B
microtubule-associated protein 1 light chain 3 gamma	MAP1LC3C
mitogen-activated protein kinase kinase 7	MAP2K7
mitogen-activated protein kinase 1	MAPK1
mitogen-activated protein kinase 3	MAPK3
mitogen-activated protein kinase 8	MAPK8
mitogen-activated protein kinase 8 interacting protein 1	MAPK8IP1
mitogen-activated protein kinase 9	MAPK9
membrane-bound transcription factor peptidase, site 2	MBTPS2
MTOR associated protein, LST8 homolog (S. cerevisiae)	MLST8
myotubularin related protein 14	MTMR14
mechanistic target of rapamycin (serine/threonine kinase)	MTOR
v-myc myelocytomatosis viral oncogene homolog (avian)	MYC
nuclear assembly factor 1 homolog (S. cerevisiae)	NAF1
nicotinamide phosphoribosyltransferase	NAMPT
neighbor of BRCA1 gene 1	NBR1
NCK-associated protein 1	NCKAP1
nuclear factor (erythroid-derived 2)-like 2	NFE2L2
nuclear factor of kappa light polypeptide gene enhancer in B-cells 1	NFKB1
NK2 transcription factor related, locus 3 (Drosophila)	NKX2-3
NLR family, CARD domain containing 4	NLRC4
Niemann-Pick disease, type C1	NPC1
neuregulin 1	NRG1
neuregulin 2	NRG2
neuregulin 3	NRG3
prolyl 4-hydroxylase, beta polypeptide	P4HB
Parkinson disease (autosomal recessive, juvenile) 2, parkin	PARK2
poly (ADP-ribose) polymerase 1	PARP1
phosphoprotein enriched in astrocytes 15	PEA15
proline, glutamate and leucine rich protein 1	PELP1
peroxisomal biogenesis factor 14	PEX14
peroxisomal biogenesis factor 3	PEX3
phosphoinositide-3-kinase, class 3	PIK3C3
phosphoinositide-3-kinase, regulatory subunit 4	PIK3R4
PTEN induced putative kinase 1	PINK1
protein phosphatase 1, regulatory (inhibitor) subunit 15A	PPP1R15A
protein kinase, AMP-activated, beta 1 non-catalytic subunit	PRKAB1
protein kinase, cAMP-dependent, regulatory, type I, alpha (tissue specific extinguisher 1)	PRKAR1A
protein kinase C, delta	PRKCD
protein kinase C, theta	PRKCQ
phosphatase and tensin homolog	PTEN
PTK6 protein tyrosine kinase 6	PTK6
RAB11A, member RAS oncogene family	RAB11A
RAB1A, member RAS oncogene family	RAB1A
RAB24, member RAS oncogene family	RAB24
RAB33B, member RAS oncogene family	RAB33B
RAB5A, member RAS oncogene family	RAB5A
RAB7A, member RAS oncogene family	RAB7A
ras-related C3 botulinum toxin substrate 1 (rho family, small GTP binding protein Rac1)	RAC1
v-raf-1 murine leukemia viral oncogene homolog 1	RAF1
retinoblastoma 1	RB1
RB1-inducible coiled-coil 1	RB1CC1
v-rel reticuloendotheliosis viral oncogene homolog A (avian)	RELA
regulator of G-protein signaling 19	RGS19
Ras homolog enriched in brain	RHEB
ribosomal protein S6 kinase, 70kDa, polypeptide 1	RPS6KB1
regulatory associated protein of MTOR, complex 1	RPTOR
SAR1 homolog A (S. cerevisiae)	SAR1A
serpin peptidase inhibitor, clade A (alpha-1 antiproteinase, antitrypsin), member 1	SERPINA1
sestrin 2	SESN2
SH3-domain GRB2-like endophilin B1	SH3GLB1
sirtuin (silent mating type information regulation 2 homolog) 1 (S. cerevisiae)	SIRT1
sirtuin (silent mating type information regulation 2 homolog) 2 (S. cerevisiae)	SIRT2
sphingosine kinase 1	SPHK1
spinster homolog 1 (Drosophila)	SPNS1
sequestosome 1	SQSTM1
suppression of tumorigenicity 13 (colon carcinoma) (Hsp70 interacting protein)	ST13
serine/threonine kinase 11	STK11
TANK-binding kinase 1	TBK1
transmembrane 9 superfamily member 1	TM9SF1
transmembrane protein 49	TMEM49
transmembrane protein 74	TMEM74
tumor necrosis factor (ligand) superfamily, member 10	TNFSF10
tumor protein p53	TP53
tumor protein p53 inducible nuclear protein 2	TP53INP2
tumor protein p63	TP63
tumor protein p73	TP73
tuberous sclerosis 1	TSC1
tuberous sclerosis 2	TSC2
tumor suppressor candidate 1	TUSC1
unc-51-like kinase 1 (C. elegans)	ULK1
unc-51-like kinase 2 (C. elegans)	ULK2
unc-51-like kinase 3 (C. elegans)	ULK3
ubiquitin specific peptidase 10	USP10
UV radiation resistance associated gene	UVRAG
vesicle-associated membrane protein 3 (cellubrevin)	VAMP3
vesicle-associated membrane protein 7	VAMP7
vascular endothelial growth factor A	VEGFA
WD repeat and FYVE domain containing 3	WDFY3
WD repeat domain 45	WDR45
WDR45-like	WDR45L
WD repeat domain, phosphoinositide interacting 1	WIPI1
WD repeat domain, phosphoinositide interacting 2	WIPI2
zinc finger, FYVE domain containing 1	ZFYVE1
