# Supplementary material for: Establishment and validation of individualized clinical prognostic markers for LUAD patients based on autophagy-related genes
Source: Aging (Albany NY). 2022 Sep 29;14(18):7328–47. doi: 10.18632/aging.204097 (PMC9550247; doi:10.18632/aging.204097)
Supplement: Supplementary Material 2 [file aging-14-204097-s002.xlsx]

## Sheet: TCGA-LUAD-ClinicalData
Supplementary Material 2. Clinical information data matrix from TCGA-LUAD.
sample	Time	Status	Gender	Age	Stage	T	N	M	riskScore	risk	Time1	Chemotherapy and radiotherapy
TCGA-05-4250	0.331507	1	1	79	3	3	1	0	0.317812	high	121	#N/A
TCGA-05-4382	1.66301	0	2	68	1	2	0	0	-0.16922	high	607	yes
TCGA-05-4384	1.16712	0	2	66	3	2	2	0	-0.181149	high	426	yes
TCGA-05-4397	2.00274	1	2	65	2	2	1	0	0.144228	high	731	#N/A
TCGA-05-4402	0.668493	1	1	57	4	2	0.5	1	-0.203883	high	244	no
TCGA-05-4403	1.58356	0	2	76	1	2	0	0	0.0838485	high	578	#N/A
TCGA-05-4415	0.249315	1	2	57	3	4	2	0	1.24624	high	91	no
TCGA-05-4418	0.750685	1	2	69	3	3	2	0	0.528783	high	274	#N/A
TCGA-05-4426	2.16712	0	2	71	1	2	0	0	-0.236087	high	791	#N/A
TCGA-05-4433	2	0	2	82	1	2	0	0	0.158172	high	730	#N/A
TCGA-05-5425	2.41644	0	2	68	2	2	1	0	-0.112938	high	882	yes
TCGA-05-5428	1.83562	0	2	57	2	1	1	0	0.118434	high	670	yes
TCGA-05-5429	0.0821918	1	2	60	3	3	2	0	0.754668	high	30	#N/A
TCGA-05-5715	0.169863	0	1	69	1	2	0	0	-0.086841	high	62	#N/A
TCGA-35-3615	0.0383562	0	2	57	1	2	0	0	-0.159971	high	14	#N/A
TCGA-35-4122	0.616438	0	2	69	1	1	0	0	0.234681	high	225	#N/A
TCGA-35-4123	0.49863	0	2	38	1	1	0	0	0.0936275	high	182	#N/A
TCGA-35-5375	0.723288	0	2	61	3	2	2	0	0.197316	high	264	#N/A
TCGA-38-4625	8.14521	0	1	66	1	2	0	0	0.013571	high	2973	no
TCGA-38-4627	3.14247	1	1	64	2	1	1	0	0.00204334	high	1147	no
TCGA-38-4629	2.36712	1	2	68	2	3	0	0	0.406844	high	864	yes
TCGA-38-4631	0.969863	1	1	72	1	2	0	0	0.584777	high	354	yes
TCGA-38-4632	3.71781	1	2	42	4	2	1	1	-0.06716	high	1357	no
TCGA-38-6178	1.2274	0	1	70	3	2	2	NA	0.18262	high	448	no
TCGA-38-A44F	0.364384	0	2	80	1	2	0	0	0.146393	high	133	no
TCGA-44-2662	3.50685	0	2	65	1	2	0	0	-0.182139	high	1280	no
TCGA-44-2665	3.56438	0	1	55	2	2	1	0	-0.045048	high	1301	no
TCGA-44-2666	0.265753	1	2	43	1	2	0	0	-0.152163	high	97	no
TCGA-44-2668	0.673973	1	2	51	1	2	0	0	0.206868	high	246	no
TCGA-44-2668	0.673973	1	2	51	1	2	0	0	0.21117	high	246	no
TCGA-44-3398	3.1863	0	1	77	1	1	0	0	-0.234036	high	1163	yes
TCGA-44-4112	1.97808	1	1	60	1	2	0	0	-0.109975	high	722	no
TCGA-44-5643	2.77534	0	2	53	3	2	2	0	0.125232	high	1013	yes
TCGA-44-5644	2.36438	0	1	51	1	2	0	NA	-0.0860582	high	863	yes
TCGA-44-6145	1.63014	0	1	62	1	1	0	0	0.0792976	high	595	yes
TCGA-44-6774	1.80274	0	1	56	3	1	2	0	-0.0570544	high	658	yes
TCGA-44-6775	1.93151	0	1	72	1	2	0	0.5	-0.216213	high	705	yes
TCGA-44-6777	2.70411	1	1	85	1	2	0.5	0.5	-0.267279	high	987	no
TCGA-44-6779	1.36986	1	1	50	2	2	1	0.5	0.422421	high	500	no
TCGA-44-7660	1.62192	0	2	72	1	2	0	0.5	0.504998	high	592	no
TCGA-44-7661	1.00274	1	1	69	1	2	0	0	0.352746	high	366	no
TCGA-44-7662	0.59726	0	2	61	1	2	0	0.5	0.0506876	high	218	yes
TCGA-44-7667	3.00548	0	1	49	2	3	0	0.5	0.036762	high	1097	yes
TCGA-44-7669	1.5726	1	2	59	2	1	1	0.5	-0.107948	high	574	no
TCGA-44-7670	2.41644	0	1	47	2	1	1	0	0.118753	high	882	yes
TCGA-44-7671	2.43562	0	2	64	1	2	0	0	0.135656	high	889	yes
TCGA-44-8117	1.05479	0	1	54	1	2	0	0	-0.0686072	high	385	yes
TCGA-44-8119	0.780822	0	2	73	2	3	0	0	0.00191559	high	285	yes
TCGA-44-A47A	1.27671	0	1	78	1	2	0	0.5	-0.232758	high	466	yes
TCGA-44-A4SS	1.13699	0	2	73	1	1	0	0	0.289343	high	415	no
TCGA-49-4487	2.34247	1	1	72	1	1	0	0	0.271347	high	855	no
TCGA-49-4488	2.38082	1	1	74	1	1	0	0.5	-0.277409	high	869	no
TCGA-49-4490	1.05479	1	1	45	3	3	2	0	0.308651	high	385	yes
TCGA-49-4494	2.96164	1	2	77	3	3	2	0	0.00700238	high	1081	#N/A
TCGA-49-4506	2.73699	1	1	68	2	2	1	0	0.6468	high	999	yes
TCGA-49-4507	0.734247	1	1	73	3	3	1	0	0.453643	high	268	yes
TCGA-49-4514	4.65753	0	1	79	1	1	0	0	0.217398	high	1700	no
TCGA-49-6742	1.21918	1	2	70	2	2	1	0	0.782988	high	445	no
TCGA-49-6743	4.4411	0	1	81	3	1	2	0.5	0.0431312	high	1621	yes
TCGA-49-6745	1.43014	0	2	82	3	2	2	0	0.0906141	high	522	yes
TCGA-49-6761	0.969863	0	1	68	3	1	2	0.5	-0.0757165	high	354	yes
TCGA-49-6767	1.85479	0	1	46	2	3	0	0.5	0.489458	high	677	#N/A
TCGA-49-AAQV	1.85479	1	1	63	2	1	1	0.5	-0.171198	high	677	no
TCGA-49-AAR2	6.09315	0	2	64	1	2	0	0.5	-0.266251	high	2224	yes
TCGA-49-AAR3	5.1863	0	2	69	2	2	1	0.5	0.355543	high	1893	yes
TCGA-49-AAR9	0.712329	1	2	61	2	3	0	0.5	1.39449	high	260	no
TCGA-49-AARN	3.10959	1	1	56	1	1	0	0.5	0.0552777	high	1135	no
TCGA-50-5044	1.70959	1	1	72	3	4	1	0	0.979912	high	624	no
TCGA-50-5045	5.95616	1	1	57	NA	2	1	0	-0.252684	high	2174	no
TCGA-50-5066	3.95068	0	2	72	1	2	0	0	0.0672021	high	1442	no
TCGA-50-5072	0.673973	1	2	74	3	2	2	0	0.698669	high	246	no
TCGA-50-5930	0.772603	1	2	47	3	2	2	0	0.00508227	high	282	no
TCGA-50-5931	1.18904	1	1	75	1	2	0	0	1.14941	high	434	no
TCGA-50-5932	2.98904	1	2	75	2	2	1	0	-0.203433	high	1091	yes
TCGA-50-5933	6.49315	1	2	72	3	4	2	0	0.167915	high	2370	no
TCGA-50-5936	0.70411	1	2	58	3	2	2	0	0.671733	high	257	no
TCGA-50-5939	1.26027	1	2	85	1	2	0	0	0.956695	high	460	no
TCGA-50-5941	4.03836	0	1	55	3	2	2	0	-0.0401661	high	1474	yes
TCGA-50-5944	4.79452	0	1	69	1	1	0	0	-0.041785	high	1750	no
TCGA-50-5946	4.43014	0	2	62	1	1	0	0.5	-0.191209	high	1617	yes
TCGA-50-5946	4.43014	0	2	62	1	1	0	0.5	-0.0811404	high	1617	yes
TCGA-50-6590	3.52877	1	1	72	1	2	0	0	0.508582	high	1288	yes
TCGA-50-6591	0.326027	1	1	63	4	2	0	1	0.654072	high	119	no
TCGA-50-6592	2.12877	1	1	71	1	2	0	0	0.283771	high	777	no
TCGA-50-6593	0.920548	1	1	49	3	1	2	0	0.0778074	high	336	no
TCGA-50-6594	1.0137	1	1	79	3	3	2	0	-0.0154652	high	370	no
TCGA-50-6673	0.060274	1	1	84	1	1	0	0	0.271257	high	22	yes
TCGA-50-8459	3.06575	0	2	68	2	3	0	0	0.386631	high	1119	no
TCGA-53-7624	2.85753	1	1	40	4	2	0	1	0.490892	high	1043	yes
TCGA-55-1596	5.65753	0	2	55	2	2	1	0	0.100206	high	2065	yes
TCGA-55-5899	2.54795	0	2	58	NA	1	1	0	0.312435	high	930	no
TCGA-55-6642	6.70959	0	2	63	1	2	0	0.5	-0.125632	high	2449	no
TCGA-55-6712	0.0657534	1	2	71	2	2	1	0.5	0.343972	high	24	no
TCGA-55-6968	3.54247	1	2	61	4	1	0	1	-0.171257	high	1293	yes
TCGA-55-6970	1.27123	1	1	67	3	2	2	0.5	0.0129218	high	464	yes
TCGA-55-6972	4.0411	1	2	72	1	2	0	0	-0.220495	high	1475	no
TCGA-55-6975	0.323288	1	2	61	2	2	1	0	0.658668	high	118	no
TCGA-55-6978	0.482192	1	2	81	2	2	0	0.5	0.229695	high	176	no
TCGA-55-6980	5.77808	0	2	56	1	1	0	0	-0.0805826	high	2109	no
TCGA-55-6981	3.77808	1	1	53	3	1	2	0	-0.0435299	high	1379	yes
TCGA-55-6982	2.72603	1	1	79	2	2	1	0	0.331226	high	995	yes
TCGA-55-6984	2.08219	1	1	71	2	2	1	0	0.826872	high	760	no
TCGA-55-6985	3.37808	0	1	58	1	2	0	0.5	-0.148164	high	1233	no
TCGA-55-6986	8.93425	0	1	74	1	2	0	0	-0.204224	high	3261	no
TCGA-55-7227	0.145205	1	2	77	3	3	1	0.5	-0.150628	high	53	yes
TCGA-55-7284	0.331507	1	2	74	2	3	0	0.5	-0.171944	high	121	no
TCGA-55-7570	2.25753	0	2	60	1	1	0	0.5	0.529799	high	824	no
TCGA-55-7724	1.93151	0	1	76	1	2	0	0.5	-0.0961936	high	705	no
TCGA-55-7725	1.21096	0	1	68	1	1	0	0.5	-0.17163	high	442	no
TCGA-55-7726	1.7863	0	1	72	1	1	0	0.5	1.01492	high	652	no
TCGA-55-7728	1.92877	0	1	64	1	2	0	0.5	-0.205665	high	704	no
TCGA-55-7816	0.120548	1	1	49	4	0.5	0.5	0.5	-0.149457	high	44	no
TCGA-55-7903	1.55342	0	2	64	1	1	0	0.5	-0.184644	high	567	no
TCGA-55-7907	0.0438356	1	2	77	2	2	1	0.5	-0.234822	high	16	no
TCGA-55-7914	0.00821918	1	1	71	2	1	1	0.5	-0.241564	high	3	no
TCGA-55-7994	1.65205	0	2	81	2	3	0	0.5	-0.0738653	high	603	no
TCGA-55-8089	0.273973	1	2	56	1	1	0	0	0.425736	high	100	no
TCGA-55-8090	0.0164384	1	2	80	1	1	0	0	-0.0233623	high	6	no
TCGA-55-8091	1.64384	0	2	74	1	2	0	0.5	-0.170523	high	600	no
TCGA-55-8092	0.0712329	1	2	75	2	3	0	0.5	-0.262969	high	26	no
TCGA-55-8094	1.48219	0	2	51	4	2	0	1	0.415639	high	541	yes
TCGA-55-8096	0.128767	1	1	67	1	2	0	0.5	-0.202194	high	47	yes
TCGA-55-8204	1.41096	0	1	87	1	2	0	0.5	0.328635	high	515	no
TCGA-55-8205	1.6411	0	1	76	2	2	0	0	-0.15858	high	599	yes
TCGA-55-8299	0.591781	1	1	61	1	1	0	0.5	0.0459365	high	216	no
TCGA-55-8302	1.30959	0	2	54	1	2	0	0.5	0.287246	high	478	no
TCGA-55-8505	1.20548	0	2	62	3	1	2	0.5	0.590589	high	440	no
TCGA-55-8508	1.69041	0	1	60	2	2	1	0.5	-0.142215	high	617	yes
TCGA-55-8511	1.51233	0	1	73	1	2	0	0.5	-0.213641	high	552	no
TCGA-55-8614	1.46849	0	2	76	1	2	0	0.5	0.230494	high	536	no
TCGA-55-8619	1.13973	0	1	72	2	3	0	0.5	-0.174705	high	416	no
TCGA-55-8620	0.180822	1	2	60	4	1	1	1	-0.0646953	high	66	no
TCGA-55-A48Y	1.72603	0	2	69	2	2	0	0	-0.148377	high	630	no
TCGA-55-A48Z	1.78356	0	1	60	3	1	3	0.5	-0.161775	high	651	yes
TCGA-55-A490	0.131507	1	2	78	2	2	0	0.5	-0.0185115	high	48	no
TCGA-55-A491	1.71507	0	1	81	1	1	0	0.5	-0.270724	high	626	no
TCGA-55-A493	0.0767123	0	1	54	1	2	0	0	-0.0657195	high	28	#N/A
TCGA-62-8394	0.380822	1	1	65	3	4	2	0	-0.0233753	high	139	yes
TCGA-62-8397	3.53151	0	1	70	2	3	0	0	0.135132	high	1289	no
TCGA-62-8398	1.21644	1	2	55	3	2	2	0	0.538174	high	444	yes
TCGA-62-8399	7.3863	0	2	62	3	2	2	0	-0.120477	high	2696	no
TCGA-62-A46O	3.98356	1	1	65	1	2	0	0	0.554457	high	1454	no
TCGA-62-A46V	6.02466	0	1	78	1	2	0	0	-0.216968	high	2199	no
TCGA-62-A470	3.27123	1	2	84	1	2	0	0	-0.264496	high	1194	yes
TCGA-62-A471	3.4137	0	2	64	2	2	1	0	1.01566	high	1246	yes
TCGA-62-A472	2.49315	0	2	70	2	3	0	0	-0.188738	high	910	no
TCGA-64-1677	1.72055	1	1	77	3	2	2	0	-0.0335743	high	628	no
TCGA-64-1678	3.25753	0	1	70	NA	2	0	0	-0.204597	high	1189	no
TCGA-64-1679	6.81644	0	1	58	3	1	2	0	-0.0558482	high	2488	yes
TCGA-64-1680	3.08493	0	2	63	4	2	2	1	-0.0844387	high	1126	yes
TCGA-64-5775	0.169863	1	2	71	3	4	0	0	1.16491	high	62	no
TCGA-64-5781	4.27123	0	1	55	1	2	0	0	0.631407	high	1559	no
TCGA-64-5815	2.3726	0	2	74	2	2	1	0	0.456079	high	866	yes
TCGA-67-3770	1.67123	0	1	70	1	1	0	0	-0.207398	high	610	#N/A
TCGA-67-3771	1.67123	0	1	77	1	1	0	0	-0.269299	high	610	#N/A
TCGA-67-3772	1.56986	0	1	82	1	2	0	0	-0.192979	high	573	#N/A
TCGA-67-3773	1.16986	0	1	84	1	2	0	0	0.15153	high	427	#N/A
TCGA-67-6216	0.386301	0	1	57	1	1	0	0	-0.00635655	high	141	no
TCGA-69-7760	0.553425	0	2	73	2	3	0	0	-0.0272487	high	202	yes
TCGA-69-7761	0.509589	0	2	84	1	2	0	0.5	0.0571478	high	186	yes
TCGA-69-7763	1.89041	0	2	69	1	1	0	0	0.0433724	high	690	no
TCGA-69-7974	0.50411	0	1	54	3	2	2	0.5	-0.160487	high	184	yes
TCGA-69-7980	1.12603	0	1	70	1	1	0	0	-0.201997	high	411	no
TCGA-69-8253	1.16712	0	1	59	2	1	1	0.5	-0.0660016	high	426	yes
TCGA-69-8255	0.353425	0	2	71	1	1	0	0	-0.271358	high	129	no
TCGA-69-8453	2.2274	0	2	77	2	3	0	0.5	0.143473	high	813	yes
TCGA-71-8520	0.00821918	1	1	60	1	2	0	0	-0.215789	high	3	yes
TCGA-73-4658	4.38356	1	1	80	1	2	0	0	-0.146625	high	1600	no
TCGA-73-4666	2.19178	0	1	52	4	1	0	1	-0.00490696	high	800	yes
TCGA-73-4670	0.358904	0	1	69	4	2	0	1	0.493701	high	131	yes
TCGA-73-4676	0.449315	1	2	45	2	2	1	0	0.154672	high	164	yes
TCGA-73-A9RS	0.835616	1	2	41	2	3	0	0	0.0328107	high	305	yes
TCGA-75-5125	5.55342	1	2	NA	2	2	1	0	-0.251652	high	2027	no
TCGA-75-6212	4.15342	1	1	NA	2	2	1	0	-0.227779	high	1516	yes
TCGA-75-6214	3.05479	1	1	NA	3	2	2	0	1.11764	high	1115	yes
TCGA-75-7027	8.38082	0	2	NA	1	2	0	0	0.321727	high	3059	yes
TCGA-78-7146	0.473973	1	1	71	3	2	2	0	0.416794	high	173	no
TCGA-78-7147	1.60548	1	1	67	2	2	1	0	0.0596773	high	586	no
TCGA-78-7148	1.71507	1	2	71	2	2	1	0	0.249818	high	626	no
TCGA-78-7149	10.7945	0	2	71	3	4	0	0	-0.0392921	high	3940	no
TCGA-78-7150	1.82466	1	2	59	2	2	1	0	1.08785	high	666	no
TCGA-78-7152	3.29315	1	2	65	1	2	0	0	-0.115253	high	1202	yes
TCGA-78-7154	1.62466	1	2	72	3	3	2	0	0.410638	high	593	#N/A
TCGA-78-7155	3.20822	1	2	68	1	2	0	0	0.689739	high	1171	#N/A
TCGA-78-7156	2.67397	1	2	62	4	4	1	1	-0.193366	high	976	no
TCGA-78-7158	0.490411	1	1	59	3	4	2	0	0.136198	high	179	yes
TCGA-78-7160	1.85753	1	2	61	4	4	2	1	0.0490827	high	678	yes
TCGA-78-7166	0.706849	1	2	84	2	2	1	0	0.547367	high	258	yes
TCGA-78-7220	2.21096	1	1	53	3	2	2	0	0.559325	high	807	no
TCGA-78-7535	2.6	1	2	45	1	2	0	0	-0.158497	high	949	no
TCGA-78-7540	2.4137	1	1	66	1	2	0	0	0.175238	high	881	no
TCGA-78-7542	0.879452	1	2	56	1	2	0	0	1.15706	high	321	#N/A
TCGA-78-7633	2.72329	1	2	67	1	2	0	0	-0.170809	high	994	#N/A
TCGA-78-8640	19.3479	0	2	59	2	1	1	0	-0.133278	high	7062	no
TCGA-78-8655	6.46575	0	1	77	1	1	0	0	-0.251131	high	2360	no
TCGA-78-8662	9.20822	1	1	53	1	2	0	0	0.0852485	high	3361	yes
TCGA-80-5611	7.10959	0	2	NA	1	2	0	0	-0.23528	high	2595	no
TCGA-83-5908	2.25753	0	1	59	1	1	0	0	0.142132	high	824	no
TCGA-86-7711	1.72603	1	2	70	2	2	1	0	-0.159285	high	630	yes
TCGA-86-7955	2.93699	0	2	62	1	2	0	0	0.274702	high	1072	yes
TCGA-86-8055	0.0273973	1	2	79	2	2	1	0	-0.0810875	high	10	no
TCGA-86-8074	0.0657534	0	1	62	2	1	1	0	-0.233498	high	24	#N/A
TCGA-86-8075	1.31233	1	1	66	1	2	0	0	-0.0426305	high	479	no
TCGA-86-8279	2.6	0	2	46	2	2	1	0	-0.17109	high	949	yes
TCGA-86-8358	1.78904	0	2	44	1	2	0	0	0.0112546	high	653	no
TCGA-86-8585	0.967123	0	2	57	1	2	0	0	-0.124179	high	353	no
TCGA-86-8672	0.0410959	1	2	59	2	3	0	0	0.462953	high	15	no
TCGA-86-8673	2.36164	0	2	61	1	2	0	0	-0.256054	high	862	no
TCGA-86-8674	2.20822	0	2	50	2	2	1	0	0.224149	high	806	yes
TCGA-86-A4D0	0.0821918	1	2	48	2	2	0	0	-0.155337	high	30	no
TCGA-86-A4JF	1.46849	1	2	56	2	3	0	0	-0.127785	high	536	yes
TCGA-91-6829	3.44658	1	2	78	1	2	0	0.5	0.117881	high	1258	no
TCGA-91-6830	0.164384	0	1	65	2	1	1	0.5	0.191366	high	60	no
TCGA-91-6847	2.30685	0	1	62	1	2	0	0.5	0.805002	high	842	yes
TCGA-91-6848	0.613699	0	2	59	3	2	2	0.5	0.259111	high	224	no
TCGA-91-6849	0.0958904	0	1	75	3	2	2	0.5	-0.237382	high	35	#N/A
TCGA-91-8499	0.0986301	0	1	76	1	1	0	0.5	0.242256	high	36	no
TCGA-91-A4BC	0.120548	0	2	59	2	2	0	0.5	-0.228357	high	44	#N/A
TCGA-93-8067	0.509589	0	2	77	1	2	0	0.5	0.354001	high	186	no
TCGA-95-7039	3.48493	0	1	54	2	3	0	0.5	0.292364	high	1272	no
TCGA-95-7043	0.10137	1	1	63	1	1	0	0.5	-0.190296	high	37	yes
TCGA-95-7562	0.238356	1	2	71	2	2	1	0	-0.0833705	high	87	yes
TCGA-95-7944	1.03288	0	2	71	1	1	0	0	0.187898	high	377	no
TCGA-95-7948	1.30411	0	1	42	1	2	0	0	-0.271969	high	476	no
TCGA-95-8494	0.230137	0	2	67	2	2	1	0	-0.17036	high	84	no
TCGA-95-A4VK	1.78356	0	1	74	3	2	2	0	-0.0097437	high	651	yes
TCGA-95-A4VN	1.51507	0	1	62	2	2	1	0	-0.271842	high	553	no
TCGA-97-8171	1.55616	0	2	81	4	2	2	1	0.122592	high	568	no
TCGA-97-8175	1.50959	0	1	55	1	2	0	0	-0.100596	high	551	yes
TCGA-97-8176	0.690411	1	2	63	3	3	1	0	0.30639	high	252	no
TCGA-97-8179	1.19178	0	2	72	1	1	0	0	-0.0688052	high	435	no
TCGA-97-8547	1.8	0	1	78	3	2	2	0.5	0.285719	high	657	no
TCGA-97-A4M5	1.73699	0	2	83	1	1	0	0	-0.217461	high	634	no
TCGA-99-8025	2.90411	0	1	72	3	3	2	0	-0.212374	high	1060	no
TCGA-99-8033	0.465753	1	1	74	4	0.5	0.5	1	0.448911	high	170	no
TCGA-J2-A4AD	0.786301	1	1	61	1	1	0	0.5	0.0661335	high	287	no
TCGA-L4-A4E5	1.58356	0	1	48	1	1	0	0	-0.10842	high	578	no
TCGA-L9-A443	0.317808	1	1	63	1	1	0	0.5	-0.00125345	high	116	no
TCGA-L9-A50W	0.728767	1	2	75	2	1	1	0.5	-0.140295	high	266	no
TCGA-L9-A5IP	0.158904	1	1	40	4	3	2	1	0.556362	high	58	no
TCGA-L9-A7SV	1.54795	0	2	69	2	2	1	0	-0.145951	high	565	yes
TCGA-MN-A4N1	2.26575	0	2	60	2	2	1	0	-0.213441	high	827	yes
TCGA-MN-A4N4	3.21918	0	2	57	1	1	0	0	-0.14527	high	1175	yes
TCGA-MN-A4N5	0.230137	0	2	63	1	1	0	0	-0.172451	high	84	yes
TCGA-MP-A4SV	7.17808	1	2	67	1	2	0	0	-0.275193	high	2620	yes
TCGA-MP-A4SY	4.11233	1	2	61	2	2	1	0	0.312535	high	1501	no
TCGA-MP-A4T7	0.457534	1	1	75	4	2	0	1	0.300762	high	167	no
TCGA-MP-A4T8	0.441096	1	2	68	3	2	2	0	0.208478	high	161	no
TCGA-MP-A4TA	2.60274	1	1	75	1	1	0	0	0.268443	high	950	no
TCGA-MP-A4TC	0.20274	1	2	77	3	1	2	0	0.215381	high	74	no
TCGA-MP-A4TE	2.45479	1	2	56	2	2	0	0.5	-0.172182	high	896	no
TCGA-MP-A4TF	0.920548	1	1	58	2	2	0	0	0.682789	high	336	no
TCGA-MP-A4TI	1.17534	1	2	72	2	2	1	0	0.316809	high	429	no
TCGA-MP-A4TK	1.59452	1	1	56	2	2	1	0.5	-0.0979415	high	582	no
TCGA-NJ-A4YF	5.92055	0	1	50	1	1	0	0	-0.240139	high	2161	yes
TCGA-NJ-A4YG	6.19452	0	2	65	1	2	0	0	-0.25362	high	2261	no
TCGA-NJ-A4YP	0.136986	0	2	52	1	2	0	0	0.070408	high	50	no
TCGA-NJ-A55O	0.0356164	0	1	56	2	1	1	0	-0.076406	high	13	no
TCGA-NJ-A7XG	1.69041	0	2	49	3	4	1	0	0.120881	high	617	yes
TCGA-05-4249	4.1726	0	2	67	1	2	0	0	-0.893466	low	1523	#N/A
TCGA-05-4389	3.75068	0	2	70	1	1	0	0	-0.392852	low	1369	no
TCGA-05-4390	3.08493	0	1	58	1	2	0	0	-0.406611	low	1126	#N/A
TCGA-05-4396	0.830137	1	2	76	3	4	1	0	-0.406029	low	303	no
TCGA-05-4398	3.92055	0	1	47	3	4	3	0	-0.691268	low	1431	#N/A
TCGA-05-4405	1.67123	0	1	74	1	2	0	0	-0.459894	low	610	yes
TCGA-05-4417	1.24658	0	1	51	1	2	0	0	-0.629501	low	455	#N/A
TCGA-05-4420	2.49863	0	2	41	1	2	0	0	-0.31783	low	912	#N/A
TCGA-05-4422	1	0	2	68	1	2	0	0	-0.60239	low	365	#N/A
TCGA-05-4424	2.50137	0	2	70	2	3	0	0	-0.420052	low	913	#N/A
TCGA-05-4425	1.83288	0	1	70	4	2	0	1	-0.423778	low	669	no
TCGA-05-4427	2.16712	0	1	65	2	2	1	0	-0.596615	low	791	yes
TCGA-05-4430	2.08493	0	1	59	1	2	0	0	-0.285427	low	761	yes
TCGA-05-4432	2.08493	0	2	66	2	2	1	0	-0.694304	low	761	no
TCGA-05-5420	1.25205	0	2	67	3	2	2	0	-0.297448	low	457	no
TCGA-05-5423	0.413699	0	2	65	2	2	1	0	-0.693097	low	151	no
TCGA-38-4626	10.0658	0	1	57	NA	2	0	0	-0.602116	low	3674	yes
TCGA-38-4628	4.08767	1	1	65	2	2	1	0	-0.322486	low	1492	no
TCGA-38-4630	2.93973	1	1	75	1	2	0	0	-0.380199	low	1073	no
TCGA-38-7271	2.19178	1	1	72	1	1	0	0	-0.442539	low	800	no
TCGA-44-2655	3.6274	0	1	65	1	1	0	0	-0.418561	low	1324	yes
TCGA-44-2656	3.91507	0	2	59	1	2	0	0	-0.706094	low	1429	yes
TCGA-44-2656	3.91507	0	2	59	1	2	0	0	-0.879781	low	1429	yes
TCGA-44-2656	3.91507	0	2	59	1	2	0	0	-0.806238	low	1429	yes
TCGA-44-2657	3.70137	0	1	74	1	2	0.5	0	-0.777623	low	1351	no
TCGA-44-2659	3.74521	0	1	65	2	1	1	0	-0.650295	low	1367	no
TCGA-44-2661	3.17534	0	1	69	1	1	0	0	-0.789331	low	1159	no
TCGA-44-2662	3.50685	0	2	65	1	2	0	0	-0.459893	low	1280	#N/A
TCGA-44-2662	3.50685	0	2	65	1	2	0	0	-0.282852	low	1280	yes
TCGA-44-2666	0.265753	1	2	43	1	2	0	0	-0.284854	low	97	no
TCGA-44-2666	0.265753	1	2	43	1	2	0	0	-0.492059	low	97	no
TCGA-44-2668	0.673973	1	2	51	1	2	0	0	-0.424475	low	246	yes
TCGA-44-3396	3.09589	0	1	74	3	2	2	0	-0.51922	low	1130	no
TCGA-44-3398	3.1863	0	1	77	1	1	0	0	-0.511361	low	1163	yes
TCGA-44-3917	3.2411	0	1	33	1	2	0	0	-0.936788	low	1183	no
TCGA-44-3917	3.2411	0	1	33	1	2	0	0	-0.497361	low	1183	no
TCGA-44-3918	2.83836	0	1	60	1	1	0	0	-0.660183	low	1036	no
TCGA-44-3918	2.83836	0	1	60	1	1	0	0	-0.933652	low	1036	no
TCGA-44-3918	2.83836	0	1	60	1	1	0	0	-0.802207	low	1036	no
TCGA-44-3919	0.520548	1	1	71	1	1	0	0	-0.524246	low	190	no
TCGA-44-4112	1.97808	1	1	60	1	2	0	0	-0.685706	low	722	no
TCGA-44-5645	2.33425	0	1	61	1	1	0.5	NA	-0.949737	low	852	no
TCGA-44-5645	2.33425	0	1	61	1	1	0.5	NA	-0.746442	low	852	no
TCGA-44-5645	2.33425	0	1	61	1	1	0.5	NA	-0.586813	low	852	yes
TCGA-44-6146	1.99452	0	2	64	2	3	0	0	-0.610816	low	728	yes
TCGA-44-6146	1.99452	0	2	64	2	3	0	0	-0.521627	low	728	yes
TCGA-44-6146	1.99452	0	2	64	2	3	0	0	-0.507488	low	728	yes
TCGA-44-6147	2.31507	0	1	67	1	1	0.5	0	-0.636841	low	845	no
TCGA-44-6147	2.31507	0	1	67	1	1	0.5	0	-1.04729	low	845	no
TCGA-44-6147	2.31507	0	1	67	1	1	0.5	0	-0.775794	low	845	no
TCGA-44-6148	1.92877	0	2	60	1	1	0	0	-0.742249	low	704	no
TCGA-44-6775	1.93151	0	1	72	1	2	0	0.5	-0.36189	low	705	no
TCGA-44-6775	1.93151	0	1	72	1	2	0	0.5	-0.962852	low	705	yes
TCGA-44-6776	7.16712	0	1	60	1	1	0	0.5	-0.509197	low	2616	no
TCGA-44-6778	5.10685	0	2	59	1	1	0	0.5	-0.355573	low	1864	no
TCGA-44-7659	1.89315	0	2	70	1	1	0	0.5	-0.338211	low	691	yes
TCGA-44-7672	1.96986	0	1	52	1	1	0	0	-0.292667	low	719	no
TCGA-44-8120	0.712329	0	2	58	1	2	0	0	-0.645248	low	260	no
TCGA-44-A479	1.33151	0	1	73	1	2	0	0.5	-0.840827	low	486	no
TCGA-44-A47B	0.786301	0	2	79	1	2	0	0	-0.613434	low	287	no
TCGA-44-A47G	0.961644	0	1	73	1	1	0	0	-0.384597	low	351	no
TCGA-44-A4SU	0.208219	1	1	67	1	1	0	0.5	-0.561662	low	76	no
TCGA-49-4486	6.35068	1	2	72	1	1	0	0	-0.376646	low	2318	no
TCGA-49-4501	3.89315	1	1	67	1	2	0	0	-0.638288	low	1421	no
TCGA-49-4505	1.1726	1	1	61	2	2	1	0	-0.56891	low	428	no
TCGA-49-4510	2.45479	1	1	51	2	2	1	0	-0.454874	low	896	yes
TCGA-49-4512	0.430137	1	1	69	3	2	2	0.5	-0.277566	low	157	no
TCGA-49-6744	4.61096	0	1	64	2	2	1	0.5	-0.361067	low	1683	no
TCGA-49-AAR0	13.0548	0	2	57	1	1	0	0.5	-0.41699	low	4765	no
TCGA-49-AAR4	2.40822	1	2	51	3	2	2	0.5	-0.491904	low	879	no
TCGA-49-AARE	3.36712	1	1	51	1	1	0	0.5	-0.463979	low	1229	#N/A
TCGA-49-AARO	10.2986	0	1	39	1	1	0	0.5	-0.349815	low	3759	no
TCGA-49-AARQ	18.4438	0	1	41	1	2	0	0.5	-0.417225	low	6732	yes
TCGA-49-AARR	13.6767	0	2	68	1	1	0	0.5	-0.575515	low	4992	no
TCGA-4B-A93V	0.69589	1	1	52	1	1	0	0	-0.378985	low	254	no
TCGA-50-5049	8.47671	0	2	70	1	2	0	0	-0.396602	low	3094	yes
TCGA-50-5051	1.24658	1	1	42	3	2	2	0	-0.302131	low	455	no
TCGA-50-5055	2.15068	1	1	79	2	1	1	0	-0.303786	low	785	no
TCGA-50-5066	3.95068	0	2	72	1	2	0	0	-0.430962	low	1442	yes
TCGA-50-5068	4.10685	1	1	59	2	2	1	0.5	-0.396991	low	1499	yes
TCGA-50-5935	1.78904	1	1	86	1	1	0	0	-0.663783	low	653	#N/A
TCGA-50-5942	5.06027	0	1	67	1	1	0	0	-0.531535	low	1847	yes
TCGA-50-6597	2.78082	1	1	79	1	2	0	0	-0.302797	low	1015	yes
TCGA-50-7109	0.69863	1	2	60	1	1	0	0	-0.676252	low	255	yes
TCGA-50-8457	3.08219	0	1	63	1	1	0	0	-0.790116	low	1125	yes
TCGA-50-8460	2.27123	0	2	74	1	1	0	0	-0.444463	low	829	yes
TCGA-53-7626	2.54521	1	1	76	2	1	1	0	-0.720041	low	929	yes
TCGA-53-7813	1.16164	0	1	51	3	4	0	0	-0.320724	low	424	no
TCGA-53-A4EZ	2.93425	0	2	63	2	2	1	0.5	-0.699157	low	1071	no
TCGA-55-1592	1.92055	1	2	65	1	2	0	0	-0.502128	low	701	no
TCGA-55-1594	3.2274	0	2	68	3	2	2	0	-0.519642	low	1178	no
TCGA-55-6543	1.19178	0	1	60	1	1	0	0.5	-0.328915	low	435	#N/A
TCGA-55-6971	3.83562	0	1	59	1	2	0	0.5	-0.335524	low	1400	yes
TCGA-55-6979	0.649315	1	1	59	2	2	1	0	-0.339235	low	237	#N/A
TCGA-55-6983	7.73425	0	2	81	2	2	1	0	-0.666953	low	2823	yes
TCGA-55-6987	5.85479	0	2	77	1	1	0	0	-0.49164	low	2137	yes
TCGA-55-7281	2.38904	0	1	70	1	1	0	0	-0.374709	low	872	#N/A
TCGA-55-7283	1.66849	0	1	76	3	3	2	0.5	-0.534665	low	609	no
TCGA-55-7573	1.33425	0	1	72	1	1	0	0.5	-0.61735	low	487	no
TCGA-55-7574	0.260274	1	1	64	1	2	0	0	-0.318047	low	95	no
TCGA-55-7576	1.83562	0	2	54	1	2	0	0	-0.380038	low	670	no
TCGA-55-7727	0.326027	0	2	70	3	1	2	0.5	-0.642438	low	119	no
TCGA-55-7815	2.11781	0	2	76	1	2	0	0.5	-0.543884	low	773	yes
TCGA-55-7910	2.84932	0	1	50	2	2	0	0	-0.362267	low	1040	#N/A
TCGA-55-7911	1.47123	0	1	70	1	1	0	0.5	-0.332183	low	537	no
TCGA-55-7913	0.169863	1	1	61	1	1	0	0.5	-0.375571	low	62	no
TCGA-55-7995	2.43562	0	1	73	1	1	0	0	-0.576132	low	889	no
TCGA-55-8085	2.47671	0	2	64	1	1	0	0	-0.352979	low	904	no
TCGA-55-8087	1.26575	0	1	59	1	2	0	0.5	-0.953942	low	462	no
TCGA-55-8097	1.30411	0	1	60	1	1	0	0.5	-0.85254	low	476	no
TCGA-55-8203	1.49863	0	1	69	1	1	0	0	-0.635774	low	547	no
TCGA-55-8206	2.43288	0	2	56	1	1	0	0	-0.942261	low	888	no
TCGA-55-8207	2.67671	0	2	73	1	2	0	0.5	-0.34868	low	977	no
TCGA-55-8208	1.84658	0	1	73	1	1	0	0	-0.498099	low	674	no
TCGA-55-8301	1.46301	0	2	58	1	2	0	0.5	-0.375554	low	534	no
TCGA-55-8506	0.030137	0	1	62	2	3	0	0.5	-0.410774	low	11	yes
TCGA-55-8507	1.14521	0	2	53	1	1	0	0.5	-0.299494	low	418	yes
TCGA-55-8512	0.00821918	1	2	41	4	1	1	1	-0.591039	low	3	no
TCGA-55-8513	2.16712	0	1	77	2	3	0	0.5	-0.391966	low	791	no
TCGA-55-8514	1.42466	0	1	70	1	2	0	0.5	-0.45187	low	520	no
TCGA-55-8615	1.22192	0	2	67	3	3	2	0.5	-0.537441	low	446	no
TCGA-55-8616	0.131507	0	1	58	1	2	0	0	-0.471404	low	48	no
TCGA-55-8621	1.41096	0	1	75	1	1	0	0.5	-0.374349	low	515	yes
TCGA-55-A48X	1.88767	0	1	63	2	1	1	0	-0.435008	low	689	no
TCGA-55-A492	1.63288	0	1	70	1	1	0	0.5	-0.37653	low	596	#N/A
TCGA-55-A494	1.31781	0	1	61	1	2	0	0.5	-0.29297	low	481	no
TCGA-55-A4DF	0.128767	1	2	88	1	1	0	0.5	-0.468341	low	47	yes
TCGA-55-A4DG	1.66575	0	2	71	1	1	0	0.5	-0.895879	low	608	no
TCGA-55-A57B	1.49589	0	1	80	1	1	0	0	-0.331337	low	546	no
TCGA-62-8395	3.33151	0	1	80	2	3	0	0	-0.443623	low	1216	yes
TCGA-62-8402	3.9589	1	1	73	3	2	2	0	-0.293192	low	1445	no
TCGA-62-A46P	1.6274	1	2	65	1	2	0	0	-0.311596	low	594	yes
TCGA-62-A46R	4.72603	1	1	54	1	2	0	0	-0.917331	low	1725	no
TCGA-62-A46S	4.52877	1	2	73	1	2	0	0	-0.726908	low	1653	no
TCGA-62-A46Y	1.13425	1	1	70	3	2	2	0	-0.388386	low	414	#N/A
TCGA-64-1676	4.73425	0	2	58	1	1	0	0	-0.369928	low	1728	no
TCGA-64-1681	3.19726	1	1	61	1	1	0	0	-0.365645	low	1167	no
TCGA-64-5774	7.33151	0	2	60	1	2	0	0	-0.368853	low	2676	yes
TCGA-64-5778	3.57534	0	2	60	1	2	0	0	-0.599211	low	1305	yes
TCGA-64-5779	2.36712	0	2	61	3	2	2	0	-0.347314	low	864	yes
TCGA-67-3774	1.05479	0	1	73	1	2	0	0	-0.433604	low	385	yes
TCGA-67-4679	1.2274	0	2	69	NA	3	0	0	-0.481986	low	448	yes
TCGA-67-6215	0.476712	0	1	52	1	2	0	0	-0.342391	low	174	yes
TCGA-67-6217	1.15616	0	1	73	2	2	1	0	-0.790711	low	422	no
TCGA-69-7764	1.13425	0	2	75	1	1	0	0	-0.62563	low	414	yes
TCGA-69-7765	0.452055	0	2	56	NA	4	0	0.5	-0.315817	low	165	#N/A
TCGA-69-7973	0.630137	0	1	42	1	2	0	0	-0.641191	low	230	#N/A
TCGA-69-7978	0.367123	0	2	59	2	2	1	0.5	-0.286368	low	134	yes
TCGA-69-7979	1.11781	0	1	71	1	2	0	0.5	-0.604346	low	408	yes
TCGA-69-8254	1.12055	0	2	85	NA	2	NA	NA	-0.708369	low	409	no
TCGA-69-A59K	1.61918	0	1	60	2	3	0	0	-0.575557	low	591	#N/A
TCGA-71-6725	0.70137	0	1	48	1	2	0	0	-0.485956	low	256	no
TCGA-73-4659	1.94795	1	2	66	3	2	2	0	-0.532649	low	711	no
TCGA-73-4662	6.89041	0	1	65	1	1	0	0	-0.89411	low	2515	no
TCGA-73-4668	1.27945	0	1	66	2	2	1	0	-0.381097	low	467	yes
TCGA-73-4675	0.109589	1	2	59	3	3	1	0	-0.32261	low	40	#N/A
TCGA-73-4677	0.10411	1	2	74	NA	2	0	0	-0.461939	low	38	yes
TCGA-73-7498	3.25753	0	1	58	1	1	0	0	-0.657026	low	1189	no
TCGA-73-7499	1.9589	1	1	81	1	2	0	0	-0.410903	low	715	no
TCGA-75-5146	6.48767	0	2	NA	1	2	0	0	-0.906738	low	2368	yes
TCGA-75-5147	3.65205	0	1	NA	1	2	0	0	-0.309408	low	1333	no
TCGA-75-6206	7.09589	0	2	NA	1	2	0	0	-0.429418	low	2590	yes
TCGA-75-7025	9.05479	0	2	NA	1	2	0	0	-0.662348	low	3305	yes
TCGA-78-7143	13.5918	1	1	62	1	2	0	0	-0.381547	low	4961	#N/A
TCGA-78-7145	2.26301	1	1	52	4	4	1	1	-0.359236	low	826	no
TCGA-78-7153	9.9589	0	1	65	1	2	0	0	-0.485542	low	3635	no
TCGA-78-7159	5.40822	0	1	60	1	1	0.5	0	-0.40895	low	1974	yes
TCGA-78-7161	0.589041	1	1	69	2	3	0	0	-0.392874	low	215	no
TCGA-78-7162	8.68219	1	2	75	1	1	0	0	-0.42382	low	3169	no
TCGA-78-7163	19.8575	0	2	60	1	2	0	0	-0.493291	low	7248	no
TCGA-78-7167	7.34521	1	2	77	4	2	0	1	-0.305504	low	2681	no
TCGA-78-7536	0.668493	1	2	69	3	2	2	0	-0.393247	low	244	no
TCGA-78-7537	4.44384	1	2	72	1	2	0	0	-0.534704	low	1622	no
TCGA-78-7539	2.16712	0	1	75	2	2	0	0	-0.785753	low	791	no
TCGA-78-8648	3.31233	1	1	58	2	3	0	0	-0.33784	low	1209	yes
TCGA-78-8660	0.879452	1	2	69	2	2	1	0	-0.345354	low	321	no
TCGA-80-5608	7.7589	0	1	NA	1	1	0	0	-0.417379	low	2832	no
TCGA-86-6851	0.490411	0	1	73	2	1	1	0	-0.89798	low	179	no
TCGA-86-7701	2.59452	0	2	66	4	2	0	1	-0.419475	low	947	no
TCGA-86-7713	3.16986	0	2	70	2	2	0	0	-0.721089	low	1157	yes
TCGA-86-7953	2.73151	0	1	69	1	1	0	0	-0.52882	low	997	no
TCGA-86-7954	1.65753	0	1	68	1	2	0	0	-0.55902	low	605	no
TCGA-86-8054	3.14521	0	2	61	2	2	1	0	-0.810195	low	1148	yes
TCGA-86-8056	0.380822	0	1	63	3	4	0	0	-0.920217	low	139	no
TCGA-86-8073	2.0274	0	2	58	1	2	0	0	-0.51809	low	740	no
TCGA-86-8076	2.72055	0	2	42	1	1	0	0	-0.496533	low	993	no
TCGA-86-8278	2.5863	0	1	63	2	2	1	0	-0.571785	low	944	no
TCGA-86-8280	1.92055	0	1	54	2	2	0	0	-0.580142	low	701	no
TCGA-86-8359	0.0712329	1	2	52	3	3	2	0	-0.338497	low	26	yes
TCGA-86-8668	1.1589	0	1	61	1	1	0	0	-0.332418	low	423	no
TCGA-86-8669	2.56986	0	2	64	1	1	0	0	-0.938519	low	938	#N/A
TCGA-86-8671	2.29863	0	1	72	2	2	1	0	-0.539876	low	839	yes
TCGA-86-A456	2.45479	0	1	78	1	1	0	0	-0.535942	low	896	no
TCGA-86-A4P7	1.13699	0	1	63	1	2	0	0	-0.515999	low	415	yes
TCGA-86-A4P8	2.20548	0	1	59	3	1	2	0.5	-0.708114	low	805	no
TCGA-91-6828	0.884932	0	2	70	1	1	0	0	-0.705785	low	323	no
TCGA-91-6831	0.849315	0	2	66	1	2	0	0.5	-0.326115	low	310	yes
TCGA-91-6835	0.216438	0	1	81	1	1	0	0	-0.597789	low	79	no
TCGA-91-6836	1.14247	0	1	52	1	2	0	0.5	-0.318602	low	417	no
TCGA-91-6840	1.01918	0	1	59	1	1	0	0	-0.305851	low	372	yes
TCGA-91-7771	1.34795	0	2	62	2	3	0	0.5	-0.791071	low	492	#N/A
TCGA-91-8496	1.38356	0	1	63	1	2	0.5	0.5	-0.442883	low	505	no
TCGA-91-8497	0.476712	1	1	75	1	1	0	0.5	-0.735786	low	174	yes
TCGA-91-A4BD	1.65205	0	2	78	2	1	1	0.5	-0.457122	low	603	yes
TCGA-93-7347	1.87123	0	1	76	1	1	0	0.5	-0.512146	low	683	no
TCGA-93-7348	1.45479	0	1	75	1	1	0	0.5	-0.378035	low	531	yes
TCGA-93-A4JN	1.96712	0	2	71	4	2	0	1	-0.322837	low	718	yes
TCGA-93-A4JO	0.090411	1	2	70	1	1	0	0.5	-0.494581	low	33	yes
TCGA-93-A4JP	1.58356	0	2	64	4	0.5	0.5	1	-0.294102	low	578	no
TCGA-93-A4JQ	1.4411	0	2	49	1	1	0	0.5	-0.440398	low	526	yes
TCGA-95-7567	1.55616	0	2	61	2	2	1	0	-0.382553	low	568	no
TCGA-95-7947	1.30685	0	2	67	1	1	0	0	-0.325181	low	477	yes
TCGA-95-8039	2.27397	0	2	72	1	1	0	0.5	-0.424945	low	830	no
TCGA-95-A4VP	1.65753	0	1	66	3	2	2	0	-0.533296	low	605	no
TCGA-97-7546	3.52055	0	1	76	1	1	0	0.5	-0.660844	low	1285	yes
TCGA-97-7547	5.38356	0	1	67	1	2	0	0.5	-0.5662	low	1965	#N/A
TCGA-97-7552	5.29315	0	2	70	1	2	0	0.5	-0.558537	low	1932	#N/A
TCGA-97-7553	5.12329	0	1	58	1	1	0	0.5	-0.401348	low	1870	no
TCGA-97-7554	2.12329	0	1	83	3	2	2	0	-0.463866	low	775	yes
TCGA-97-7937	1.54521	0	2	65	1	2	0	0.5	-0.310748	low	564	yes
TCGA-97-7938	0.0493151	1	1	76	1	1	0	0.5	-0.493617	low	18	yes
TCGA-97-7941	1.32603	0	1	72	1	1	0	0.5	-0.28192	low	484	no
TCGA-97-8172	1.49315	0	1	75	1	2	0	0	-1.02206	low	545	no
TCGA-97-8174	0.449315	1	2	67	2	2	0	0	-0.531445	low	164	#N/A
TCGA-97-8177	1.36712	0	1	59	1	2	0	0	-0.375101	low	499	no
TCGA-97-8552	1.71507	0	1	55	1	1	0	0.5	-0.66206	low	626	no
TCGA-97-A4LX	1.68219	0	2	81	1	2	0	0	-0.624132	low	614	yes
TCGA-97-A4M0	1.7863	0	1	60	1	2	0	0	-0.676016	low	652	yes
TCGA-97-A4M1	1.64658	0	1	52	1	1	0	0	-0.604859	low	601	no
TCGA-97-A4M2	1.70959	0	2	66	1	1	0	0	-0.668236	low	624	#N/A
TCGA-97-A4M3	1.47945	0	1	69	1	1	0	0	-0.317007	low	540	no
TCGA-97-A4M6	1.55616	0	1	45	1	1	0	0	-0.497601	low	568	no
TCGA-97-A4M7	1.72329	0	2	74	1	1	0	0	-0.434461	low	629	no
TCGA-99-7458	2.04658	0	1	74	3	4	0	0	-0.509349	low	747	no
TCGA-99-8028	3.06301	0	1	50	1	1	0	0	-0.33781	low	1118	yes
TCGA-99-8032	0.120548	0	2	61	1	1	0	0	-0.449618	low	44	no
TCGA-99-AA5R	1.80274	0	1	70	1	1	0	0	-0.46202	low	658	no
TCGA-J2-8192	2.02466	0	1	65	2	2	1	0.5	-0.285611	low	739	no
TCGA-J2-8194	1.98356	0	1	69	2	3	0	0.5	-0.418107	low	724	yes
TCGA-J2-A4AE	2.95616	0	1	77	1	1	0	0.5	-0.480527	low	1079	#N/A
TCGA-J2-A4AG	2.70685	0	1	66	1	1	0	0.5	-0.640002	low	988	no
TCGA-L4-A4E6	1.19178	0	2	67	1	1	0	0	-0.51026	low	435	no
TCGA-L9-A444	0.841096	0	1	60	1	1	0	0.5	-0.476675	low	307	yes
TCGA-L9-A743	1.81918	0	2	56	2	2	1	0	-0.322429	low	664	no
TCGA-L9-A8F4	1.30411	0	1	64	1	2	0	0.5	-0.479625	low	476	yes
TCGA-MP-A4SW	4.87123	1	2	53	2	2	1	0	-0.422856	low	1778	no
TCGA-MP-A4T4	7.16986	1	1	68	2	2	1	0	-0.431875	low	2617	no
TCGA-MP-A4T6	4.90411	1	1	76	3	1	2	0.5	-0.869472	low	1790	no
TCGA-MP-A4T9	3.46575	1	1	54	3	2	2	0.5	-0.287806	low	1265	no
TCGA-MP-A4TD	0.841096	1	2	71	3	2	2	0	-0.308624	low	307	no
TCGA-MP-A4TH	2.03014	0	1	70	1	1	0	0	-0.895589	low	741	yes
TCGA-MP-A4TJ	0.928767	1	1	62	1	1	0	0	-0.432406	low	339	yes
TCGA-MP-A5C7	6.1589	0	1	76	1	2	0	0	-0.785585	low	2248	no
TCGA-NJ-A4YI	0.0109589	1	1	87	3	2	2	0	-0.575528	low	4	no
TCGA-NJ-A4YQ	3.92329	0	1	69	1	1	0	0	-0.546298	low	1432	no
TCGA-NJ-A55A	0.0410959	0	1	76	1	2	0	0	-0.627835	low	15	no
TCGA-NJ-A55R	1.65205	0	2	67	1	1	0	0.5	-0.289587	low	603	yes
TCGA-O1-A52J	4.92603	1	1	74	1	1	0	0.5	-0.489428	low	1798	no
TCGA-S2-AA1A	1.40548	0	1	68	1	1	0	0	-0.452111	low	513	no
