# Supplementary material for: Establishment and validation of individualized clinical prognostic markers for LUAD patients based on autophagy-related genes
Source: Aging (Albany NY). 2022 Sep 29;14(18):7328–47. doi: 10.18632/aging.204097 (PMC9550247; doi:10.18632/aging.204097)
Supplement: Supplementary Material 3 [file aging-14-204097-s003.xls]

## Sheet: GSE68465-clinicalDataMatrix
Supplementary Material 3. Clinical information matrix of GSE68465 from GEO database.
	Age	Time-Month	Status	Gender	Smoking	Stage	T	N	Age	Time	Race	Stage
GSM1672281	74	105.6	0	2	1	1	1	0	2	8.8	White	pN0pT1
GSM1672282	74	25.2	0	2	1	1	1	0	2	2.1	White	pN0pT1
GSM1672283	74	64.8	1	2	1	2	2	0	2	5.4	White	pN0pT2
GSM1672284	82	69.2	0	2	0	1	1	0	2	5.77	Unknown	pN0pT1
GSM1672285	59	33.9	1	2	0	2	2	0	1	2.83	White	pN0pT2
GSM1672286	60	83	0	2	1	1	1	0	1	6.92	White	pN0pT1
GSM1672287	54	69.2	0	2	1	1	1	0	1	5.77	White	pN0pT1
GSM1672288	63	27.1	0	2	1	1	1	0	1	2.26	White	pN0pT1
GSM1672289	63	5.8	1	2	1	1	1	0	1	0.48	White	pN0pT1
GSM1672290	66	50.2	1	1	1	3	3	0	2	4.18	White	pN0pT3
GSM1672291	52	73	0	2	1	1	1	0	1	6.08	Unknown	pN0pT1
GSM1672292	62	34.8	1	2	1	1	1	0	1	2.9	White	pN0pT1
GSM1672293	60	27.6	1	1	1	1	1	0	1	2.3	White	pN0pT1
GSM1672294	66	48.8	1	2	1	2	2	0	2	4.07	White	pN0pT2
GSM1672295	61	66.6	0	2	0	2	2	0	1	5.55	Asian	pN0pT2
GSM1672296	68	10.1	1	2	1	2	2	0	2	0.84	White	pN0pT2
GSM1672297	48	8.7	1	2	1	2	2	0	1	0.73	White	pN0pT2
GSM1672298	75	61.2	1	2	1	1	1	0	2	5.1	White	pN0pT1
GSM1672299	50	132.2	0	2	1	2	2	0	1	11.02	White	pN0pT2
GSM1672300	75	128.8	1	2	1	1	1	0	2	10.73	White	pN0pT1
GSM1672301	72	43.8	1	2	1	2	2	0	2	3.65	White	pN0pT2
GSM1672302	72	5.9	1	2	1	2	2	2	2	0.49	White	pN2pT2
GSM1672303	71	2.4	1	1	1	3	3	2	2	0.2	White	pN2pT3
GSM1672304	58	17.6	1	1	1	2	2	2	1	1.47	White	pN2pT2
GSM1672305	63	16.3	1	1	1	1	1	2	1	1.36	Unknown	pN2pT1
GSM1672306	74	29.6	1	2	1	1	1	2	2	2.47	White	pN2pT1
GSM1672307	76	81.2	1	1	1	2	2	0	2	6.77	White	pN0pT2
GSM1672308	59	59	1	1	1	1	1	0	1	4.92	White	pN0pT1
GSM1672309	71	92.6	1	1	1	2	2	2	2	7.72	White	pN2pT2
GSM1672310	45	4	1	2	1	3	3	0	1	0.33	White	pN0pT3
GSM1672311	78	16.8	1	2	1	1	1	2	2	1.4	White	pN2pT1
GSM1672312	75	62	0	1	1	2	2	0	2	5.17	White	pN0pT2
GSM1672313	61	62.3	1	1	1	2	2	0	1	5.19	White	pN0pT2
GSM1672314	65	71.8	0	1	1	1	1	0	1	5.98	White	pN0pT1
GSM1672315	69	84	0	1	1	1	1	0	2	7	Black or African American	pN0pT1
GSM1672316	73	18.6	1	1	1	2	2	0	2	1.55	White	pN0pT2
GSM1672317	51	45.8	1	1	Unknown	2	2	0	1	3.82	White	pN0pT2
GSM1672318	63	20.6	1	2	1	2	2	0	1	1.72	Unknown	pN0pT2
GSM1672319	60	110.5	0	1	1	1	1	0	1	9.21	White	pN0pT1
GSM1672320	42	133.6	0	1	1	1	1	0	1	11.13	White	pN0pT1
GSM1672321	56	70.5	1	1	1	1	1	1	1	5.88	White	pN1pT1
GSM1672322	69	52.1	0	2	1	1	1	0	2	4.34	White	pN0pT1
GSM1672323	58	17.6	1	2	0	2	2	2	1	1.47	Asian	pN2pT2
GSM1672324	62	16.9	1	1	1	2	2	2	1	1.41	Black or African American	pN2pT2
GSM1672325	62	86.8	0	2	1	1	1	0	1	7.23	White	pN0pT1
GSM1672326	65	103.4	0	1	1	2	2	0	1	8.62	Unknown	pN0pT2
GSM1672327	73	117.6	0	2	0	2	2	0	2	9.8	White	pN0pT2
GSM1672328	52	115.8	1	2	1	2	2	1	1	9.65	White	pN1pT2
GSM1672329	72	19	1	1	1	1	1	0	2	1.58	White	pN0pT1
GSM1672330	65	84.1	1	1	1	1	1	0	1	7.01	White	pN0pT1
GSM1672331	65	153.3	0	2	1	1	1	0	1	12.78	White	pN0pT1
GSM1672332	59	153.9	0	2	Unknown	2	2	0	1	12.83	White	pN0pT2
GSM1672333	62	162.6	0	2	1	1	1	0	1	13.55	White	pN0pT1
GSM1672334	63	63.8	0	1	1	2	2	0	1	5.32	White	pN0pT2
GSM1672335	54	132.5	1	2	1	1	1	0	1	11.04	White	pN0pT1
GSM1672336	57	130.8	0	2	--	1	1	0	1	10.9	White	pN0pT1
GSM1672337	59	159.6	0	2	1	1	1	0	1	13.3	Black or African American	pN0pT1
GSM1672338	48	157.7	0	2	0	1	1	0	1	13.14	White	pN0pT1
GSM1672339	44	76.3	0	2	1	1	1	0	1	6.36	White	pN0pT1
GSM1672340	40	105.9	0	2	1	1	1	0	1	8.83	White	pN0pT1
GSM1672341	64	28.2	1	1	1	2	2	2	1	2.35	Not Reported	pN2pT2
GSM1672342	69	7.2	1	1	1	1	1	2	2	0.6	White	pN2pT1
GSM1672343	67	79.5	1	1	1	1	1	0	2	6.63	White	pN0pT1
GSM1672344	62	82.3	0	2	1	1	1	0	1	6.86	White	pN0pT1
GSM1672345	60	101.2	0	1	1	2	2	0	1	8.43	White	pN0pT2
GSM1672346	46	168.1	0	1	1	1	1	0	1	14.01	Asian	pN0pT1
GSM1672347	77	14.9	1	1	1	1	1	2	2	1.24	White	pN2pT1
GSM1672348	56	9.6	1	1	1	2	2	2	1	0.8	White	pN2pT2
GSM1672349	53	95	0	2	1	1	1	0	1	7.92	White	pN0pT1
GSM1672350	51	62.4	0	1	1	2	2	0	1	5.2	White	pN0pT2
GSM1672351	63	64.3	0	2	1	2	2	1	1	5.36	Black or African American	pN1pT2
GSM1672352	85	20.9	1	2	1	1	1	0	2	1.74	White	pN0pT1
GSM1672353	60	22.3	1	2	1	1	1	1	1	1.86	White	pN1pT1
GSM1672354	58	67.9	1	1	1	2	2	1	1	5.66	White	pN1pT2
GSM1672355	81	36.3	0	1	1	1	1	0	2	3.03	White	pN0pT1
GSM1672356	52	22.7	1	2	1	2	2	1	1	1.89	White	pN1pT2
GSM1672357	81	32.9	0	2	0	2	2	1	2	2.74	Not Reported	pN1pT2
GSM1672358	57	38.1	0	2	0	1	1	0	1	3.18	Not Reported	pN0pT1
GSM1672359	76	54.2	1	2	0	1	1	0	2	4.52	Not Reported	pN0pT1
GSM1672360	60	96.1	1	2	1	1	1	1	1	8.01	White	pN1pT1
GSM1672361	62	53.2	0	2	1	1	1	0	1	4.43	White	pN0pT1
GSM1672362	68	12.5	1	1	1	2	2	1	2	1.04	White	pN1pT2
GSM1672363	73	29.5	0	1	1	1	1	0	2	2.46	Not Reported	pN0pT1
GSM1672364	65	107.5	0	2	1	1	1	1	1	8.96	White	pN1pT1
GSM1672365	63	53.7	0	1	1	2	2	0	1	4.48	White	pN0pT2
GSM1672366	70	21.8	0	1	1	1	1	0	2	1.82	White	pN0pT1
GSM1672367	78	55.8	0	1	1	1	1	0	2	4.65	White	pN0pT1
GSM1672368	54	21	1	1	1	2	2	1	1	1.75	White	pN1pT2
GSM1672369	78	7.3	1	1	1	1	1	1	2	0.61	White	pN1pT1
GSM1672370	66	159.9	0	1	Unknown	2	2	0	2	13.33	White	pN0pT2
GSM1672371	72	60.8	0	1	1	1	1	0	2	5.07	White	pN0pT1
GSM1672372	81	21.2	1	2	0	1	1	0	2	1.77	White	pN0pT1
GSM1672373	69	53.6	0	2	0	2	2	0	2	4.47	White	pN0pT2
GSM1672374	59	23.2	0	1	1	3	3	2	1	1.93	White	pN2pT3
GSM1672375	76	47.27	0	2	Unknown	2	2	0	2	3.94	White	pN0pT2
GSM1672376	70	59.11	1	1	Unknown	2	2	0	2	4.93	White	pN0pT2
GSM1672377	58	51.58	0	1	Unknown	2	2	0	1	4.3	White	pN0pT2
GSM1672378	48	36.25	1	2	Unknown	2	2	0	1	3.02	White	pN0pT2
GSM1672379	82	6.6	1	1	Unknown	3	3	0	2	0.55	White	pN0pT3
GSM1672380	62	54.93	1	1	Unknown	1	1	0	1	4.58	White	pN0pT1
GSM1672381	82	9.74	1	1	Unknown	4	4	0	2	0.81	White	pN0pT4
GSM1672382	68	58.88	0	1	Unknown	1	1	0	2	4.91	White	pN0pT1
GSM1672383	58	51.81	0	1	Unknown	2	2	0	1	4.32	Black or African American	pN0pT2
GSM1672384	63	21.48	1	1	Unknown	1	1	0	1	1.79	White	pN0pT1
GSM1672385	78	6.38	1	1	Unknown	2	2	1	2	0.53	White	pN1pT2
GSM1672386	57	69.01	1	2	Unknown	2	2	0	1	5.75	Black or African American	pN0pT2
GSM1672387	77	64.14	0	2	Unknown	1	1	0	2	5.35	White	pN0pT1
GSM1672388	86	32.24	1	2	Unknown	4	4	0	2	2.69	White	pN0pT4
GSM1672390	73	56.35	0	1	Unknown	2	2	0	2	4.7	White	pN0pT2
GSM1672391	70	69.05	0	2	Unknown	1	1	0	2	5.75	White	pN0pT1
GSM1672392	75	56.32	0	2	Unknown	1	1	0	2	4.69	White	pN0pT1
GSM1672393	49	61.25	0	2	Unknown	1	1	0	1	5.1	White	pN0pT1
GSM1672394	51	50.43	0	2	Unknown	1	1	0	1	4.2	White	pN0pT1
GSM1672395	66	73.36	0	1	Unknown	1	1	0	2	6.11	White	pN0pT1
GSM1672396	76	66.74	0	2	Unknown	2	2	0	2	5.56	White	pN0pT2
GSM1672397	78	72.8	0	2	Unknown	1	1	0	2	6.07	White	pN0pT1
GSM1672398	76	19.9	1	1	Unknown	1	1	0	2	1.66	White	pN0pT1
GSM1672399	60	31.28	1	2	Unknown	3	3	1	1	2.61	White	pN1pT3
GSM1672400	73	45.33	1	1	Unknown	1	1	0	2	3.78	White	pN0pT1
GSM1672401	72	83.95	0	2	Unknown	1	1	0	2	7	White	pN0pT1
GSM1672402	55	12.63	1	2	Unknown	4	4	0	1	1.05	White	pN0pT4
GSM1672403	64	77.89	0	2	Unknown	2	2	0	1	6.49	White	pN0pT2
GSM1672404	53	11.18	0	2	Unknown	2	2	0	1	0.93	White	pN0pT2
GSM1672405	77	30.53	0	2	Unknown	4	4	0	2	2.54	White	pN0pT4
GSM1672406	55	73.59	0	2	Unknown	1	1	0	1	6.13	White	pN0pT1
GSM1672407	67	11.68	1	1	Unknown	2	2	0	2	0.97	White	pN0pT2
GSM1672408	70	74.61	0	2	Unknown	1	1	0	2	6.22	White	pN0pT1
GSM1672409	72	31.94	1	2	Unknown	2	2	0	2	2.66	White	pN0pT2
GSM1672410	43	2.24	1	1	Unknown	1	1	0	1	0.19	White	pN0pT1
GSM1672411	52	8.85	1	2	Unknown	1	1	1	1	0.74	White	pN1pT1
GSM1672412	69	92.2	0	2	Unknown	1	1	0	2	7.68	White	pN0pT1
GSM1672413	33	90.07	0	2	Unknown	2	2	0	1	7.51	Not Reported	pN0pT2
GSM1672414	59	24.97	1	1	Unknown	3	3	1	1	2.08	White	pN1pT3
GSM1672415	62	42.04	1	1	Unknown	1	1	0	1	3.5	White	pN0pT1
GSM1672416	70	12.2	1	1	Unknown	1	1	0	2	1.02	Unknown	pN0pT1
GSM1672417	74	2.7	1	1	Unknown	3	3	1	2	0.23	Unknown	pN1pT3
GSM1672418	46	96	1	1	Unknown	2	2	0	1	8	Unknown	pN0pT2
GSM1672419	67	66.1	1	1	Unknown	4	4	0	2	5.51	Unknown	pN0pT4
GSM1672420	60	68.6	1	1	Unknown	2	2	0	1	5.72	Unknown	pN0pT2
GSM1672421	75	48	1	1	Unknown	2	2	0	2	4	Unknown	pN0pT2
GSM1672422	64	16	1	1	Currently smoking	3	3	1	1	1.33	White	pN1pT3
GSM1672423	62	72	0	1	1	2	2	0	1	6	White	pN0pT2
GSM1672424	70	47	0	2	1	1	1	0	2	3.92	White	pN0pT1
GSM1672425	67	52	1	1	1	3	3	2	2	4.33	White	pN2pT3
GSM1672426	56	39	1	2	Currently smoking	2	2	1	1	3.25	White	pN1pT2
GSM1672427	57	66	0	1	1	1	1	1	1	5.5	White	pN1pT1
GSM1672428	81	44	0	2	0	2	2	0	2	3.67	White	pN0pT2
GSM1672429	65	70	0	2	1	1	1	0	1	5.83	White	pN0pT1
GSM1672430	73	75	0	2	0	2	2	2	2	6.25	White	pN2pT2
GSM1672431	65	92	0	1	Currently smoking	1	1	0	1	7.67	White	pN0pT1
GSM1672432	62	65	0	1	1	1	1	0	1	5.42	White	pN0pT1
GSM1672433	71	43	0	1	1	2	2	2	2	3.58	White	pN2pT2
GSM1672434	82	69	0	2	Currently smoking	1	1	0	2	5.75	White	pN0pT1
GSM1672435	68	40	1	1	1	2	2	0	2	3.33	White	pN0pT2
GSM1672436	48	21	1	2	0	2	2	2	1	1.75	White	pN2pT2
GSM1672437	82	29	1	2	1	2	2	0	2	2.42	White	pN0pT2
GSM1672438	64	26	1	1	1	2	2	2	1	2.17	White	pN2pT2
GSM1672439	68	77	0	1	1	2	2	0	2	6.42	White	pN0pT2
GSM1672440	58	2	1	1	1	2	2	2	1	0.17	White	pN2pT2
GSM1672441	73	66	0	1	1	1	1	0	2	5.5	White	pN0pT1
GSM1672442	52	14	1	2	Currently smoking	2	2	2	1	1.17	White	pN2pT2
GSM1672443	62	33	0	1	1	2	2	0	1	2.75	White	pN0pT2
GSM1672444	51	85	0	1	Currently smoking	2	2	0	1	7.08	White	pN0pT2
GSM1672445	62	66	0	1	1	2	2	0	1	5.5	Black or African American	pN0pT2
GSM1672446	50	15	0	2	Currently smoking	1	1	0	1	1.25	White	pN0pT1
GSM1672447	65	91	0	1	Currently smoking	2	2	0	1	7.58	Asian	pN0pT2
GSM1672448	74	68	1	1	1	2	2	0	2	5.67	White	pN0pT2
GSM1672449	55	33	0	2	1	2	2	1	1	2.75	White	pN1pT2
GSM1672450	54	24	1	1	1	3	3	2	1	2	White	pN2pT3
GSM1672451	76	62	0	1	1	1	1	0	2	5.17	White	pN0pT1
GSM1672452	64	114	1	2	1	2	2	2	1	9.5	White	pN2pT2
GSM1672453	58	4	1	2	1	2	2	2	1	0.33	White	pN2pT2
GSM1672454	70	20	1	1	1	2	2	1	2	1.67	White	pN1pT2
GSM1672455	57	52	1	2	1	2	2	2	1	4.33	White	pN2pT2
GSM1672456	67	93	0	2	1	2	2	1	2	7.75	White	pN1pT2
GSM1672457	74	14	1	2	Currently smoking	2	2	0	2	1.17	White	pN0pT2
GSM1672458	59	100	0	2	0	2	2	1	1	8.33	White	pN1pT2
GSM1672459	66	33	0	2	1	2	2	0	2	2.75	White	pN0pT2
GSM1672460	67	32	1	1	0	1	1	1	2	2.67	White	pN1pT1
GSM1672461	57	60	0	2	1	1	1	0	1	5	White	pN0pT1
GSM1672462	64	50	0	1	1	2	2	0	1	4.17	White	pN0pT2
GSM1672463	59	15	1	2	1	2	2	0	1	1.25	Black or African American	pN0pT2
GSM1672464	76	37	0	2	0	2	2	0	2	3.08	White	pN0pT2
GSM1672465	82	54	0	2	1	2	2	0	2	4.5	White	pN0pT2
GSM1672466	58	31	0	1	1	1	1	0	1	2.58	White	pN0pT1
GSM1672467	65	38	0	1	Currently smoking	2	2	0	1	3.17	White	pN0pT2
GSM1672468	49	115	0	2	0	1	1	2	1	9.58	White	pN2pT1
GSM1672469	71	36	0	2	1	2	2	2	2	3	White	pN2pT2
GSM1672470	61	48	1	2	1	1	1	0	1	4	White	pN0pT1
GSM1672471	75	19	1	1	1	2	2	2	2	1.58	White	pN2pT2
GSM1672472	46	91	0	2	1	1	1	0	1	7.58	White	pN0pT1
GSM1672473	74	204	1	2	1	2	2	0	2	17	Asian	pN0pT2
GSM1672474	51	50	0	2	0	2	2	1	1	4.17	White	pN1pT2
GSM1672475	54	80	0	1	1	1	1	0	1	6.67	White	pN0pT1
GSM1672476	50	42	1	2	1	2	2	2	1	3.5	White	pN2pT2
GSM1672477	69	60	0	2	1	2	2	0	2	5	White	pN0pT2
GSM1672478	63	26	0	2	Currently smoking	2	2	1	1	2.17	White	pN1pT2
GSM1672479	76	62	1	2	1	2	2	0	2	5.17	White	pN0pT2
GSM1672480	72	22	0	2	1	2	2	1	2	1.83	White	pN1pT2
GSM1672481	70	63	0	2	1	1	1	0	2	5.25	White	pN0pT1
GSM1672482	76	68	0	1	1	1	1	0	2	5.67	White	pN0pT1
GSM1672483	81	7	0	2	1	1	1	0	2	0.58	White	pN0pT1
GSM1672484	61	52	1	2	0	2	2	0	1	4.33	White	pN0pT2
GSM1672485	53	36	0	2	0	1	1	0	1	3	White	pN0pT1
GSM1672486	72	15	1	2	1	2	2	1	2	1.25	White	pN1pT2
GSM1672487	53	20	1	2	1	2	2	1	1	1.67	White	pN1pT2
GSM1672488	61	41	0	1	1	2	2	0	1	3.42	White	pN0pT2
GSM1672489	66	25	1	1	Unknown	2	2	2	2	2.08	White	pN2pT2
GSM1672490	74	42	0	2	Currently smoking	2	2	1	2	3.5	White	pN1pT2
GSM1672491	48	51	1	2	1	1	1	2	1	4.25	White	pN2pT1
GSM1672492	65	50	0	2	Currently smoking	2	2	0	1	4.17	White	pN0pT2
GSM1672493	70	57	1	2	1	2	2	0	2	4.75	Black or African American	pN0pT2
GSM1672494	79	13	1	2	Currently smoking	2	2	0	2	1.08	White	pN0pT2
GSM1672495	67	78	1	1	1	2	2	0	2	6.5	White	pN0pT2
GSM1672496	77	48	0	1	1	2	2	0	2	4	White	pN0pT2
GSM1672497	63	33	1	2	1	1	1	2	1	2.75	White	pN2pT1
GSM1672498	76	37	0	2	1	2	2	0	2	3.08	White	pN0pT2
GSM1672499	72	17	1	1	1	2	2	1	2	1.42	White	pN1pT2
GSM1672500	51	24	1	2	1	1	1	0	1	2	White	pN0pT1
GSM1672501	63	44	0	2	0	1	1	0	1	3.67	White	pN0pT1
GSM1672502	80	30	0	2	1	1	1	0	2	2.5	White	pN0pT1
GSM1672503	74	50	0	2	0	2	2	1	2	4.17	White	pN1pT2
GSM1672504	58	88	0	2	1	1	1	0	1	7.33	White	pN0pT1
GSM1672505	62	42	0	2	1	2	2	0	1	3.5	White	pN0pT2
GSM1672506	67	46	0	2	Unknown	1	1	0	2	3.83	White	pN0pT1
GSM1672507	71	56	0	2	1	1	1	0	2	4.67	White	pN0pT1
GSM1672508	61	40	0	2	1	1	1	0	1	3.33	White	pN0pT1
GSM1672509	38	38	0	2	0	2	2	2	1	3.17	White	pN2pT2
GSM1672510	72	43	0	2	1	2	2	1	2	3.58	White	pN1pT2
GSM1672511	43	55	0	2	1	1	1	0	1	4.58	White	pN0pT1
GSM1672512	65	17	1	2	0	2	2	2	1	1.42	White	pN2pT2
GSM1672513	54	36	0	2	0	2	2	0	1	3	White	pN0pT2
GSM1672514	79	10	1	2	0	1	1	1	2	0.83	White	pN1pT1
GSM1672515	61	23	1	1	0	2	2	0	1	1.92	White	pN0pT2
GSM1672516	74	62	0	1	1	2	2	0	2	5.17	White	pN0pT2
GSM1672517	80	85	0	2	1	3	3	0	2	7.08	White	pN0pT3
GSM1672518	68	47	1	2	1	2	2	0	2	3.92	White	pN0pT2
GSM1672519	64	48	1	2	1	1	1	0	1	4	White	pN0pT1
GSM1672520	58	57	0	2	1	2	2	1	1	4.75	White	pN1pT2
GSM1672521	57	43	0	1	1	2	2	0	1	3.58	Unknown	pN0pT2
GSM1672522	57	41	0	2	1	2	2	0	1	3.42	White	pN0pT2
GSM1672523	67	43	0	1	0	2	2	0	2	3.58	White	pN0pT2
GSM1672524	75	32	0	2	1	2	2	1	2	2.67	White	pN1pT2
GSM1672525	74	64	0	1	0	1	1	0	2	5.33	White	pN0pT1
GSM1672526	59	107	0	1	1	2	2	0	1	8.92	Unknown	pN0pT2
GSM1672527	75	25	1	1	1	2	2	0	2	2.08	Unknown	pN0pT2
GSM1672528	60	96	0	2	1	2	2	0	1	8	Unknown	pN0pT2
GSM1672529	41	98	0	2	1	2	2	0	1	8.17	Unknown	pN0pT2
GSM1672530	59	37	1	1	Currently smoking	1	1	0	1	3.08	Unknown	pN0pT1
GSM1672531	60	90	0	2	1	2	2	0	1	7.5	Unknown	pN0pT2
GSM1672532	43	40	0	1	1	1	1	1	1	3.33	White	pN1pT1
GSM1672533	54	71	1	1	1	2	2	0	1	5.92	Unknown	pN0pT2
GSM1672534	52	9	1	2	1	2	2	1	1	0.75	Unknown	pN1pT2
GSM1672535	47	110	0	1	1	2	2	0	1	9.17	Unknown	pN0pT2
GSM1672536	55	110	0	2	1	2	2	0	1	9.17	Unknown	pN0pT2
GSM1672537	66	6	1	2	0	2	2	0	2	0.5	Unknown	pN0pT2
GSM1672538	70	95	1	2	1	1	1	1	2	7.92	Unknown	pN1pT1
GSM1672539	68	38	1	1	1	2	2	0	2	3.17	Unknown	pN0pT2
GSM1672540	61	9	1	2	1	2	2	0	1	0.75	Unknown	pN0pT2
GSM1672541	60	87	0	2	1	2	2	0	1	7.25	Unknown	pN0pT2
GSM1672542	35	88	0	1	1	2	2	0	1	7.33	Unknown	pN0pT2
GSM1672543	53	74	0	2	1	2	2	1	1	6.17	Unknown	pN1pT2
GSM1672544	54	8	1	1	1	2	2	1	1	0.67	Unknown	pN1pT2
GSM1672545	73	59	0	2	1	2	2	0	2	4.92	White	pN0pT2
GSM1672546	38	55	0	2	1	2	2	0	1	4.58	Unknown	pN0pT2
GSM1672547	58	36	0	1	1	2	2	0	1	3	White	pN0pT2
GSM1672548	65	15	1	1	1	2	2	0	1	1.25	Unknown	pN0pT2
GSM1672549	66	85	0	2	0	2	2	0	2	7.08	Unknown	pN0pT2
GSM1672550	66	9	1	1	1	2	2	1	2	0.75	Unknown	pN1pT2
GSM1672551	76	11	1	1	1	2	2	1	2	0.92	Native Hawaiian or Other Pacific Islander	pN1pT2
GSM1672552	53	79	1	1	1	2	2	0	1	6.58	Unknown	pN0pT2
GSM1672553	60	105	0	1	1	2	2	0	1	8.75	Unknown	pN0pT2
GSM1672554	40	97	0	2	1	2	2	0	1	8.08	Unknown	pN0pT2
GSM1672555	67	4	1	1	1	2	2	1	2	0.33	Unknown	pN1pT2
GSM1672556	62	36	1	1	1	2	2	0	1	3	Unknown	pN0pT2
GSM1672557	61	44	1	1	0	1	1	1	1	3.67	White	pN1pT1
GSM1672558	63	74	1	1	1	2	2	1	1	6.17	Unknown	pN1pT2
GSM1672559	62	13	1	1	1	2	2	1	1	1.08	Unknown	pN1pT2
GSM1672560	51	90	0	2	1	2	2	0	1	7.5	Unknown	pN0pT2
GSM1672561	53	85	0	2	1	2	2	0	1	7.08	Unknown	pN0pT2
GSM1672562	56	71	1	2	1	2	2	1	1	5.92	Unknown	pN1pT2
GSM1672563	61	64	1	1	1	1	1	1	1	5.33	Unknown	pN1pT1
GSM1672564	52	65	1	2	1	2	2	0	1	5.42	Unknown	pN0pT2
GSM1672565	60	68	0	1	1	2	2	0	1	5.67	White	pN0pT2
GSM1672566	57	64	0	1	1	2	2	1	1	5.33	White	pN1pT2
GSM1672567	46	63	0	2	Unknown	2	2	0	1	5.25	White	pN0pT2
GSM1672568	71	13	1	1	1	2	2	1	2	1.08	Unknown	pN1pT2
GSM1672569	53	95	0	1	1	2	2	1	1	7.92	Not Reported	pN1pT2
GSM1672570	68	74	0	1	1	1	1	1	2	6.17	Not Reported	pN1pT1
GSM1672571	72	57	1	2	1	2	2	1	2	4.75	Not Reported	pN1pT2
GSM1672572	68	56	1	2	1	1	1	0	2	4.67	Not Reported	pN0pT1
GSM1672573	65	48	0	1	1	2	2	1	1	4	Not Reported	pN1pT2
GSM1672574	68	49	0	2	0	2	2	0	2	4.08	Not Reported	pN0pT2
GSM1672575	68	28	0	1	1	1	1	0	2	2.33	Not Reported	pN0pT1
GSM1672576	57	36	0	2	1	2	2	0	1	3	Not Reported	pN0pT2
GSM1672577	56	40	0	2	Unknown	1	1	0	1	3.33	Not Reported	pN0pT1
GSM1672578	56	37	0	1	1	2	2	0	1	3.08	Not Reported	pN0pT2
GSM1672579	51	40	0	2	Unknown	1	1	0	1	3.33	Not Reported	pN0pT1
GSM1672580	68	23	1	2	1	1	1	0	2	1.92	Not Reported	pN0pT1
GSM1672581	61	76	0	1	Currently smoking	2	2	0	1	6.33	Not Reported	pN0pT2
GSM1672582	62	34	1	2	1	1	1	0	1	2.83	Not Reported	pN0pT1
GSM1672583	73	66	0	1	0	2	2	0	2	5.5	Not Reported	pN0pT2
GSM1672584	63	29	1	2	Currently smoking	2	2	1	1	2.42	Not Reported	pN1pT2
GSM1672585	72	7	1	1	0	2	2	0	2	0.58	Not Reported	pN0pT2
GSM1672586	57	53	0	2	Currently smoking	1	1	0	1	4.42	Not Reported	pN0pT1
GSM1672587	55	63	0	2	Unknown	1	1	0	1	5.25	Not Reported	pN0pT1
GSM1672588	64	23	0	1	1	2	2	0	1	1.92	Not Reported	pN0pT2
GSM1672589	40	62	0	2	Currently smoking	2	2	0	1	5.17	Not Reported	pN0pT2
GSM1672590	75	7	1	2	0	3	3	0	2	0.58	Not Reported	pN0pT3
GSM1672591	60	26	0	1	1	2	2	0	1	2.17	Not Reported	pN0pT2
GSM1672592	58	40	0	2	Currently smoking	2	2	0	1	3.33	Not Reported	pN0pT2
GSM1672593	64	30	0	1	1	2	2	0	1	2.5	Not Reported	pN0pT2
GSM1672594	62	40	0	1	1	2	2	0	1	3.33	Not Reported	pN0pT2
GSM1672595	75	84	0	1	0	1	1	0	2	7	Not Reported	pN0pT1
GSM1672596	76	18	1	1	Currently smoking	2	2	0	2	1.5	Not Reported	pN0pT2
GSM1672597	59	25	1	2	1	1	1	1	1	2.08	Not Reported	pN1pT1
GSM1672598	54	80	0	1	1	1	1	0	1	6.67	Not Reported	pN0pT1
GSM1672599	74	12	1	1	1	2	2	1	2	1	Not Reported	pN1pT2
GSM1672600	70	32	0	2	0	2	2	0	2	2.67	Not Reported	pN0pT2
GSM1672601	68	105	0	2	1	2	2	0	2	8.75	Not Reported	pN0pT2
GSM1672602	69	81	0	1	1	3	3	0	2	6.75	Not Reported	pN0pT3
GSM1672603	75	75	0	1	1	2	2	0	2	6.25	Not Reported	pN0pT2
GSM1672604	64	97	0	1	1	2	2	0	1	8.08	Not Reported	pN0pT2
GSM1672605	79	18	1	1	0	2	2	1	2	1.5	Not Reported	pN1pT2
GSM1672606	69	32	1	1	1	2	2	0	2	2.67	Not Reported	pN0pT2
GSM1672607	77	10	1	1	1	2	2	1	2	0.83	Not Reported	pN1pT2
GSM1672608	66	44.94	1	2	1	2	2	0	2	3.75	Black or African American	pN0pT2
GSM1672609	79	34.76	1	1	1	2	2	0	2	2.9	White	pN0pT2
GSM1672610	72	19.84	1	2	1	2	2	0	2	1.65	White	pN0pT2
GSM1672611	67	8.61	1	1	1	4	4	2	2	0.72	White	pN2pT4
GSM1672612	79	0.53	1	2	Currently smoking	2	2	2	2	0.04	White	pN2pT2
GSM1672613	74	37.55	1	2	1	2	2	2	2	3.13	White	pN2pT2
GSM1672615	40	123.3	0	1	1	2	2	0	1	10.28	White	pN0pT2
GSM1672616	79	56.8	1	1	1	1	1	1	2	4.73	White	pN1pT1
GSM1672617	75	30.12	1	2	1	3	3	0	2	2.51	White	pN0pT3
GSM1672619	77	105.99	1	2	0	1	1	0	2	8.83	White	pN0pT1
GSM1672620	66	44.42	1	2	1	4	4	0	2	3.7	White	pN0pT4
GSM1672621	49	20.86	1	1	1	2	2	0	1	1.74	White	pN0pT2
GSM1672622	62	27.63	1	1	1	2	2	1	1	2.3	White	pN1pT2
GSM1672623	66	74.18	1	1	1	2	2	0	2	6.18	White	pN0pT2
GSM1672624	87	96	1	2	0	1	1	0	2	8	White	pN0pT1
GSM1672625	62	41.33	1	2	1	1	1	1	1	3.44	White	pN1pT1
GSM1672626	82	5.65	1	1	1	3	3	0	2	0.47	White	pN0pT3
GSM1672627	77	0.43	1	1	1	2	2	0	2	0.04	White	pN0pT2
GSM1672628	61	16.56	1	2	Currently smoking	2	2	0	1	1.38	White	pN0pT2
GSM1672629	81	61.21	1	1	1	1	1	0	2	5.1	White	pN0pT1
GSM1672630	72	104.47	0	2	1	2	2	1	2	8.71	White	pN1pT2
GSM1672631	67	70.6	1	2	1	2	2	0	2	5.88	White	pN0pT2
GSM1672632	74	3.52	1	2	1	2	2	2	2	0.29	White	pN2pT2
GSM1672633	64	17.54	1	2	1	2	2	0	1	1.46	White	pN0pT2
GSM1672634	65	27.56	1	2	1	2	2	0	1	2.3	White	pN0pT2
GSM1672635	76	16.39	1	1	Currently smoking	3	3	0	2	1.37	White	pN0pT3
GSM1672636	66	77.7	0	2	0	2	2	0	2	6.48	White	pN0pT2
GSM1672637	70	94.16	0	1	1	1	1	0	2	7.85	Black or African American	pN0pT1
GSM1672638	66	73.4	0	2	1	2	2	0	2	6.12	White	pN0pT2
GSM1672639	70	45.24	1	1	1	2	2	0	2	3.77	White	pN0pT2
GSM1672640	63	0.03	1	1	1	2	2	0	1	0	White	pN0pT2
GSM1672641	68	75.73	1	2	0	2	2	0	2	6.31	White	pN0pT2
GSM1672642	76	39.06	1	1	1	2	2	0	2	3.26	White	pN0pT2
GSM1672643	49	77.6	1	1	1	2	2	2	1	6.47	White	pN2pT2
GSM1672644	61	2.27	1	1	1	2	2	2	1	0.19	White	pN2pT2
GSM1672646	60	42.18	1	1	Currently smoking	3	3	0	1	3.52	White	pN0pT3
GSM1672647	73	85.65	1	2	1	1	1	0	2	7.14	White	pN0pT1
GSM1672648	47	92.52	0	1	1	3	3	0	1	7.71	White	pN0pT3
GSM1672649	64	39.36	1	1	1	2	2	0	1	3.28	White	pN0pT2
GSM1672650	66	82.5	0	2	Currently smoking	1	1	0	2	6.88	White	pN0pT1
GSM1672651	48	31.7	0	1	1	2	2	1	1	2.64	White	pN1pT2
GSM1672652	79	42.02	1	1	1	4	4	1	2	3.5	White	pN1pT4
GSM1672653	68	5.78	1	2	1	2	2	2	2	0.48	White	pN2pT2
GSM1672654	68	7.69	1	2	Currently smoking	4	4	2	2	0.64	White	pN2pT4
GSM1672655	82	47.9	1	2	1	2	2	0	2	3.99	White	pN0pT2
GSM1672656	70	58.84	0	1	1	2	2	0	2	4.9	White	pN0pT2
GSM1672657	75	81.54	0	1	1	2	2	0	2	6.8	White	pN0pT2
GSM1672658	63	24.51	1	2	1	2	2	0	1	2.04	White	pN0pT2
GSM1672659	81	7.03	1	2	1	2	2	0	2	0.59	White	pN0pT2
GSM1672660	75	9.63	1	2	1	3	3	0	2	0.8	White	pN0pT3
GSM1672661	60	40.21	1	2	0	2	2	0	1	3.35	White	pN0pT2
GSM1672662	60	66.69	0	2	Currently smoking	2	2	0	1	5.56	White	pN0pT2
GSM1672663	71	40.97	1	2	1	2	2	0	2	3.41	White	pN0pT2
GSM1672664	73	76.12	0	1	1	2	2	0	2	6.34	White	pN0pT2
GSM1672665	77	72.64	1	1	1	2	2	0	2	6.05	White	pN0pT2
GSM1672666	50	11.99	1	1	1	3	3	0	1	1	White	pN0pT3
GSM1672667	59	6.24	1	2	1	2	2	1	1	0.52	White	pN1pT2
GSM1672668	70	21.88	1	1	1	1	1	0	2	1.82	White	pN0pT1
GSM1672669	58	78.85	0	1	1	2	2	1	1	6.57	White	pN1pT2
GSM1672670	60	72.05	0	1	1	2	2	0	1	6	White	pN0pT2
GSM1672671	72	28.25	1	1	Currently smoking	2	2	1	2	2.35	Asian	pN1pT2
GSM1672672	62	53.39	0	2	0	2	2	0	1	4.45	White	pN0pT2
GSM1672673	77	39.03	0	2	0	1	1	0	2	3.25	White	pN0pT1
GSM1672674	82	52.2	1	1	1	2	2	0	2	4.35	White	pN0pT2
GSM1672675	73	15.77	1	1	Currently smoking	2	2	0	2	1.31	White	pN0pT2
GSM1672676	57	27.66	1	2	Currently smoking	2	2	1	1	2.31	White	pN1pT2
GSM1672677	73	29.67	1	1	1	2	2	1	2	2.47	White	pN1pT2
GSM1672678	70	12.02	1	2	1	3	3	1	2	1	White	pN1pT3
GSM1672679	53	150.18	0	1	1	2	2	0	1	12.52	White	pN0pT2
GSM1672680	75	15.47	1	1	1	3	3	2	2	1.29	Black or African American	pN2pT3
GSM1672681	71	24.74	1	2	1	2	2	1	2	2.06	White	pN1pT2
GSM1672682	36	16.49	1	1	Currently smoking	2	2	1	1	1.37	White	pN1pT2
GSM1672683	68	8.94	1	2	1	2	2	2	2	0.75	White	pN2pT2
GSM1672684	68	26.38	1	2	1	3	3	0	2	2.2	White	pN0pT3
GSM1672685	65	18.2	1	1	1	1	1	2	1	1.52	White	pN2pT1
GSM1672686	51	79.54	1	2	0	2	2	2	1	6.63	White	pN2pT2
GSM1672687	62	30.7	1	1	Unknown	1	1	0	1	2.56	Unknown	pN0pT1
GSM1672688	72	80.9	1	1	Unknown	3	3	0	2	6.74	Unknown	pN0pT3
GSM1672689	69	11.7	1	1	--	2	2	2	2	0.98	Unknown	pN2pT2
GSM1672690	68	33.2	1	1	Unknown	3	3	1	2	2.77	Unknown	pN1pT3
GSM1672691	57	42.5	1	1	Unknown	1	1	1	1	3.54	Unknown	pN1pT1
GSM1672692	69	122.4	1	1	Unknown	2	2	0	2	10.2	Unknown	pN0pT2
GSM1672693	58	30.2	1	1	Unknown	1	1	0	1	2.52	Unknown	pN0pT1
GSM1672694	72	78.5	1	1	Unknown	1	1	1	2	6.54	Unknown	pN1pT1
GSM1672695	47	73.2	1	1	Unknown	2	2	0	1	6.1	Unknown	pN0pT2
GSM1672696	64	65.2	1	1	Unknown	1	1	2	1	5.43	Unknown	pN2pT1
GSM1672697	59	145.8	0	1	Unknown	3	3	0	1	12.15	Unknown	pN0pT3
GSM1672698	69	73.7	1	1	Unknown	1	1	0	2	6.14	Unknown	pN0pT1
GSM1672699	77	3.3	1	1	Unknown	1	1	1	2	0.28	Unknown	pN1pT1
GSM1672700	77	19.5	1	1	Unknown	1	1	0	2	1.63	Unknown	pN0pT1
GSM1672701	70	8.4	1	1	Unknown	2	2	1	2	0.7	Unknown	pN1pT2
GSM1672702	57	26.9	1	1	Unknown	4	4	0	1	2.24	Unknown	pN0pT4
GSM1672703	67	129.8	0	1	Unknown	2	2	0	2	10.82	Unknown	pN0pT2
GSM1672704	66	19.6	1	1	Unknown	3	3	1	2	1.63	Unknown	pN1pT3
GSM1672705	78	105.4	1	1	Unknown	2	2	0	2	8.78	Unknown	pN0pT2
GSM1672706	46	157.5	1	1	Unknown	2	2	0	1	13.13	Unknown	pN0pT2
GSM1672707	62	120.5	1	1	Unknown	1	1	0	1	10.04	Unknown	pN0pT1
GSM1672708	66	47.8	1	1	Unknown	2	2	0	2	3.98	Unknown	pN0pT2
GSM1672709	65	130	1	1	Unknown	2	2	1	1	10.83	Unknown	pN1pT2
GSM1672710	46	52.3	0	2	Unknown	1	1	1	1	4.36	Unknown	pN1pT1
GSM1672711	63	69.4	0	2	Unknown	1	1	1	1	5.78	Unknown	pN1pT1
GSM1672712	60	25.95	1	1	Unknown	1	1	1	1	2.16	Unknown	pN1pT1
GSM1672713	77	121.8	0	1	Unknown	2	2	0	2	10.15	Unknown	pN0pT2
GSM1672714	44	32.6	1	1	Unknown	2	2	2	1	2.72	Unknown	pN2pT2
GSM1672715	49	40.2	1	1	Unknown	4	4	2	1	3.35	Unknown	pN2pT4
GSM1672716	70	14.5	1	1	Unknown	1	1	2	2	1.21	Unknown	pN2pT1
GSM1672717	68	9.2	1	1	Unknown	1	1	0	2	0.77	Unknown	pN0pT1
GSM1672718	66	19	1	1	Unknown	2	2	0	2	1.58	Unknown	pN0pT2
GSM1672719	74	121.2	0	1	Unknown	2	2	2	2	10.1	Unknown	pN2pT2
GSM1672720	62	9	1	1	Unknown	2	2	2	1	0.75	Unknown	pN2pT2
GSM1672721	81	97.6	0	1	Unknown	2	2	0	2	8.13	Unknown	pN0pT2
GSM1672722	65	175.9	0	1	Unknown	1	1	1	1	14.66	Unknown	pN1pT1
GSM1672723	61	45.3	1	1	Unknown	2	2	1	1	3.78	Unknown	pN1pT2
