# Supplementary material for: Establishment and validation of individualized clinical prognostic markers for LUAD patients based on autophagy-related genes
Source: Aging (Albany NY). 2022 Sep 29;14(18):7328–47. doi: 10.18632/aging.204097 (PMC9550247; doi:10.18632/aging.204097)
Supplement: Supplementary Material 4 [file aging-14-204097-s004.xls]

## Sheet: EIF2AK3-1
Supplementary Material 4. RT-qPCR data of EIF2AK3 and ITGB1.
样品	目的基因Ct值	目的基因 Ct值	目的基因 Ct值	目的基因的Ct平均值	管家基因Ct值	管家基因Ct值	管家基因Ct值	管家基因 Ct平均值	目的基因的Ct—管家基因的△Ct值				△△Ct1	△△Ct2	△△Ct3	2-△△Ct1	2-△△Ct2	2-△△Ct3	△△Ct	2-△△Ct	Sd
	重复1	重复2	重复3		重复1	重复2	重复3		△Ct1	△Ct2	△Ct3	平均值	△Ct-M3	△Ct-M3	△Ct-M3				(△Ct-目的基因的△Ct)
H1975	26.2538	26.4876	26.287	26.3428	16.5014	17.0824	16.6788	16.7542	9.75235	9.40529	9.6082	9.58861	0.163736	-0.183322	0.0195859	0.89271	1.1355	0.986516	0	1	0.122433
BEAS-2B	24.1414	23.912	24.2371	24.0968	16.5499	16.4208	16.6236	16.5314	7.59151	7.49119	7.61356	7.56542	-1.99711	-2.09742	-1.97505	3.99198	4.27944	3.93143	-2.02319	4.06483	0.185927

## Sheet: EIF2AK3-2
样品	目的基因Ct值	目的基因 Ct值	目的基因 Ct值	目的基因的Ct平均值	管家基因Ct值	管家基因Ct值	管家基因Ct值	管家基因 Ct平均值	目的基因的Ct—管家基因的△Ct值				△△Ct1	△△Ct2	△△Ct3	2-△△Ct1	2-△△Ct2	2-△△Ct3	△△Ct	2-△△Ct	Sd
	重复1	重复2	重复3		重复1	重复2	重复3		△Ct1	△Ct2	△Ct3	平均值	△Ct-M3	△Ct-M3	△Ct-M3				(△Ct-目的基因的△Ct)
H1975	26.1409	26.2205	26.1313	26.1642	16.6209	16.7115	16.6812	16.6712	9.51996	9.50907	9.45008	9.49303	0.0269254	0.0160306	-0.042956	0.98151	0.98895	1.03022	0	1	0.0262416
BEAS-2B	24.0276	24.0378	24.0437	24.0364	16.3659	16.4244	16.4684	16.4196	7.66168	7.6134	7.57529	7.61679	-1.83136	-1.87964	-1.91775	3.55872	3.67983	3.77832	-1.87625	3.67119	0.109995

## Sheet: EIF2AK3-3
样品	目的基因Ct值	目的基因 Ct值	目的基因 Ct值	目的基因的Ct平均值	管家基因Ct值	管家基因Ct值	管家基因Ct值	管家基因 Ct平均值	目的基因的Ct—管家基因的△Ct值				△△Ct1	△△Ct2	△△Ct3	2-△△Ct1	2-△△Ct2	2-△△Ct3	△△Ct	2-△△Ct	Sd
	重复1	重复2	重复3		重复1	重复2	重复3		△Ct1	△Ct2	△Ct3	平均值	△Ct-M3	△Ct-M3	△Ct-M3				(△Ct-目的基因的△Ct)
H1975	26.2017	26.0752	26.2012	26.1594	16.7286	16.6	16.6171	16.6485	9.47313	9.47519	9.58419	9.51083	-0.0377076	-0.0356477	0.0733554	1.02648	1.02502	0.950425	0	1	0.0434946
BEAS-2B	24.3614	24.3341	24.309	24.3348	16.9549	16.7645	16.7557	16.825	7.40653	7.56964	7.55326	7.50981	-2.10431	-1.94119	-1.95757	4.29991	3.84023	3.88408	-2.00102	4.00284	0.253688

## Sheet: ITGB1-1
样品	目的基因Ct值	目的基因 Ct值	目的基因 Ct值	目的基因的Ct平均值	管家基因Ct值	管家基因Ct值	管家基因Ct值	管家基因 Ct平均值	目的基因的Ct—管家基因的△Ct值				△△Ct1	△△Ct2	△△Ct3	2-△△Ct1	2-△△Ct2	2-△△Ct3	△△Ct	2-△△Ct	Sd
	重复1	重复2	重复3		重复1	重复2	重复3		△Ct1	△Ct2	△Ct3	平均值	△Ct-M3	△Ct-M3	△Ct-M3				(△Ct-目的基因的△Ct)
H1975	17.9865	17.9252	18.1189	18.0102	16.5499	16.4208	16.6236	16.5314	1.43661	1.50443	1.49536	1.4788	-3.84407	-3.77625	-3.78532	14.3608	13.7014	13.7878	-3.80188	13.947	0.358384
BEAS-2B	22.0686	22.0389	21.9971	22.0349	16.5014	17.0824	16.6788	16.7542	5.56715	4.95657	5.31832	5.28068	0.286469	-0.324111	0.0376422	0.819906	1.25189	0.974246	0	1	0.218907

## Sheet: ITGB1-2
样品	目的基因Ct值	目的基因 Ct值	目的基因 Ct值	目的基因的Ct平均值	管家基因Ct值	管家基因Ct值	管家基因Ct值	管家基因 Ct平均值	目的基因的Ct—管家基因的△Ct值				△△Ct1	△△Ct2	△△Ct3	2-△△Ct1	2-△△Ct2	2-△△Ct3	△△Ct	2-△△Ct	Sd
	重复1	重复2	重复3		重复1	重复2	重复3		△Ct1	△Ct2	△Ct3	平均值	△Ct-M3	△Ct-M3	△Ct-M3				(△Ct-目的基因的△Ct)
H1975	17.9975	18.0026	18.1242	18.0414	16.3659	16.4244	16.4684	16.4196	1.63157	1.57818	1.65579	1.62184	-3.66605	-3.71944	-3.64182	12.6938	13.1723	12.4824	-3.67577	12.7796	0.353476
BEAS-2B	22.1437	21.7927	21.97	21.9688	16.6209	16.7115	16.6812	16.6712	5.52282	5.08122	5.2888	5.29761	0.225206	-0.216394	-0.00881195	0.855473	1.16183	1.00613	0	1	0.153184

## Sheet: ITGB1-3
样品	目的基因Ct值	目的基因 Ct值	目的基因 Ct值	目的基因的Ct平均值	管家基因Ct值	管家基因Ct值	管家基因Ct值	管家基因 Ct平均值	目的基因的Ct—管家基因的△Ct值				△△Ct1	△△Ct2	△△Ct3	2-△△Ct1	2-△△Ct2	2-△△Ct3	△△Ct	2-△△Ct	Sd
	重复1	重复2	重复3		重复1	重复2	重复3		△Ct1	△Ct2	△Ct3	平均值	△Ct-M3	△Ct-M3	△Ct-M3				(△Ct-目的基因的△Ct)
H1975	18.2839	18.2339	18.2095	18.2424	16.9549	16.7645	16.7557	16.825	1.32899	1.46946	1.45378	1.41741	-3.92908	-3.78861	-3.80428	15.2324	13.8192	13.9702	-3.84065	14.3269	0.776022
BEAS-2B	22.0225	21.927	21.7702	21.9066	16.7286	16.6	16.6171	16.6485	5.29397	5.32707	5.15316	5.25806	0.0359033	0.0690034	-0.104907	0.975421	0.953296	1.07542	0	1	0.0650714

## Sheet: EIF2AK3三遍整合
样品	目的基因Ct值	目的基因 Ct值	目的基因 Ct值	目的基因的Ct平均值	管家基因Ct值	管家基因Ct值	管家基因Ct值	管家基因 Ct平均值	目的基因的Ct—管家基因的△Ct值				△△Ct1	△△Ct2	△△Ct3	2-△△Ct1	2-△△Ct2	2-△△Ct3	△△Ct	2-△△Ct	Sd
	重复1	重复2	重复3		重复1	重复2	重复3		△Ct1	△Ct2	△Ct3	平均值	△Ct-M3	△Ct-M3	△Ct-M3				(△Ct-目的基因的△Ct)
H1975-1	26.3428	26.1642	26.1594	26.2221	16.7542	16.6712	16.6485	16.6913	9.58861	9.49303	9.51083	9.53083	0.0577842	-0.0377911	-0.019993	0.960739	1.02654	1.01395	0	1	0.0349292
BEAS-2B	24.0968	24.0364	24.3348	24.156	16.5314	16.4196	16.825	16.592	7.56542	7.61679	7.50981	7.564	-1.96541	-1.91404	-2.02102	3.90523	3.76863	4.0587	-1.96682	3.90906	0.145116

## Sheet: ITGB1三遍整合
样品	目的基因Ct值	目的基因 Ct值	目的基因 Ct值	目的基因的Ct平均值	管家基因Ct值	管家基因Ct值	管家基因Ct值	管家基因 Ct平均值	目的基因的Ct—管家基因的△Ct值				△△Ct1	△△Ct2	△△Ct3	2-△△Ct1	2-△△Ct2	2-△△Ct3	△△Ct	2-△△Ct	Sd
	重复1	重复2	重复3		重复1	重复2	重复3		△Ct1	△Ct2	△Ct3	平均值	△Ct-M3	△Ct-M3	△Ct-M3				(△Ct-目的基因的△Ct)
H1975-1	18.0102	18.0414	18.2424	18.098	16.5314	16.4196	16.825	16.592	1.4788	1.62184	1.41741	1.50602	-3.79998	-3.65694	-3.86138	13.9287	12.6139	14.5342	-3.77277	13.6684	0.981725
BEAS-2B	22.0349	21.9688	21.9066	21.9701	16.7542	16.6712	16.6485	16.6913	5.28068	5.29761	5.25806	5.27879	0.00189527	0.0188274	-0.0207227	0.998687	0.987035	1.01447	0	1	0.0137681
